# Supplementary material for: Associations between comorbidities and immediate and one-year outcomes following supervised exercise therapy and patient education – A cohort study of 24,513 individuals with knee or hip osteoarthritis
Source: PubMed Central journal article supplement — Osteoarthritis Cartilage. 2021 Jan;29(1):39–49. doi: 10.1016/j.joca.2020.11.001 (PMC7116561; doi:10.1016/j.joca.2020.11.001), 2021-01
Supplement: EMS108849-supplement-Supplementary_material.pdf [file EMS108849-supplement-Supplementary_material.pdf]

## Supplementary material

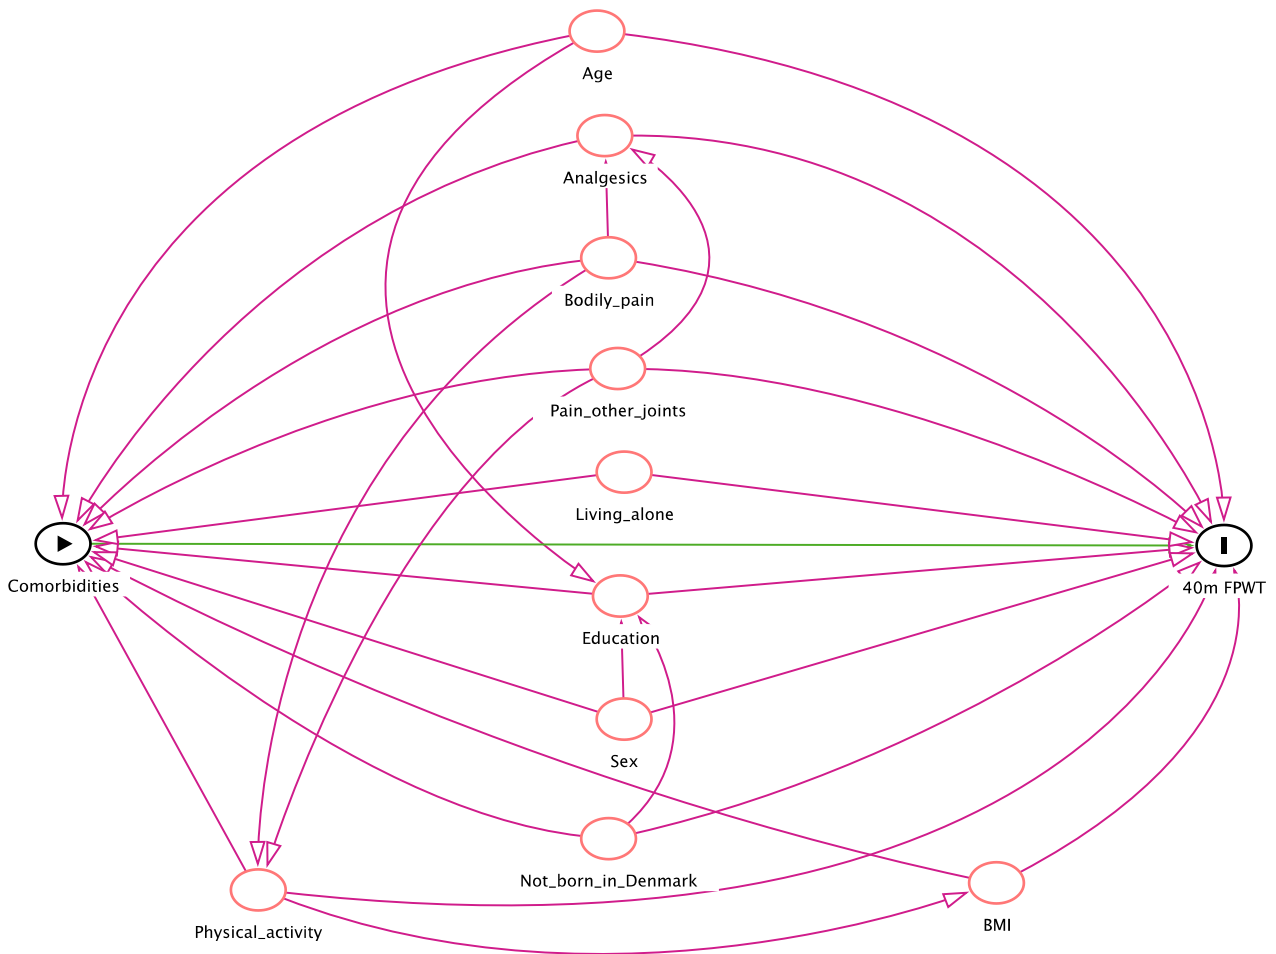

**Supplementary Figure S1.** Directs Acyclic Graph (DAG) of the assumed causal relations between exposure, outcome (in this example 40-m FPWT), and confounders in the primary analyses. Red lines and variables reflect possible confounding paths. Green line reflects the assumed causal path.

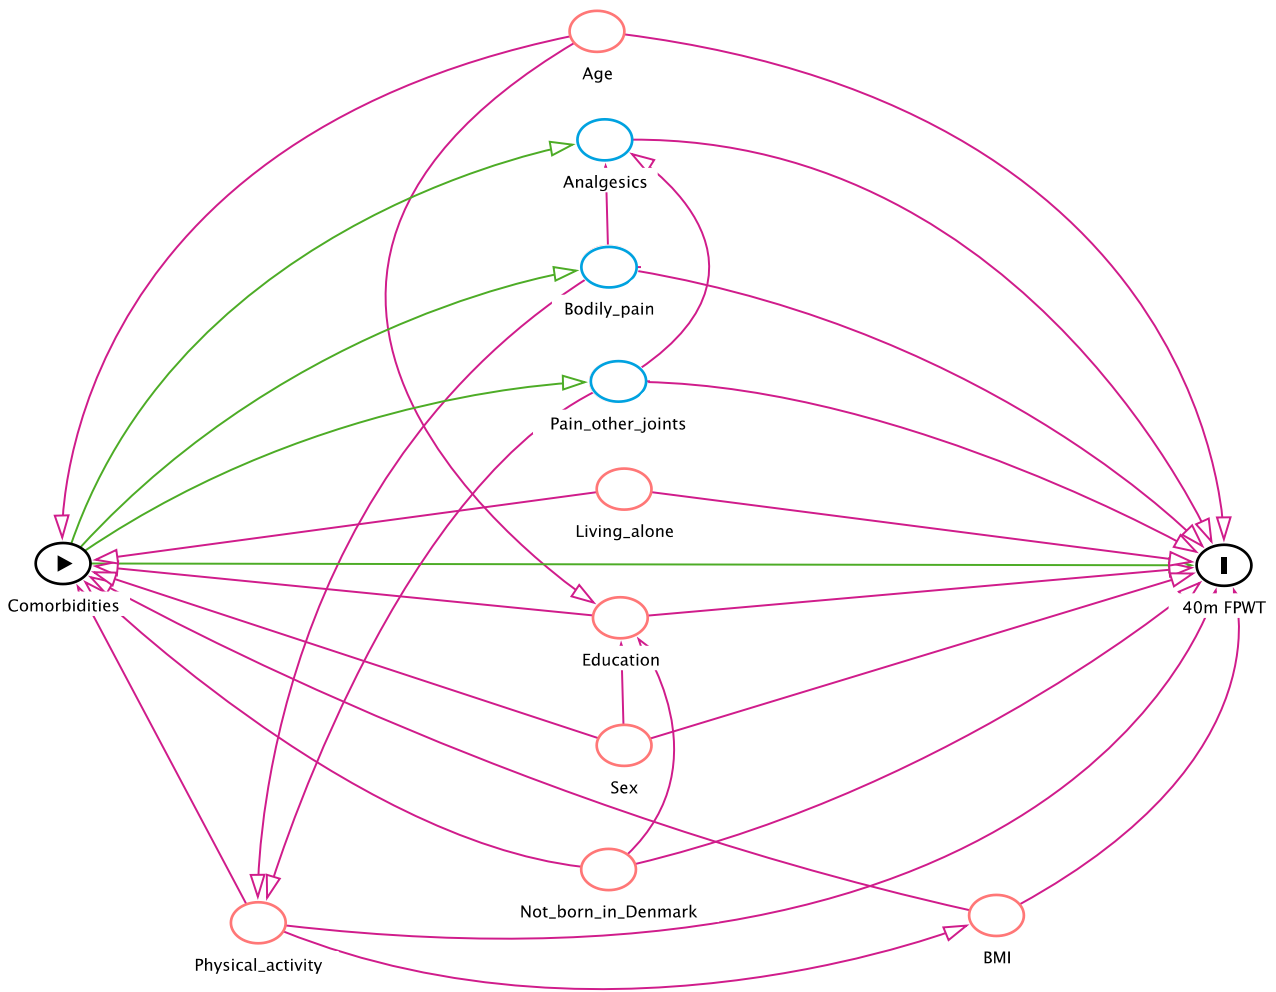

**Supplementary Figure S2.** Directs Acyclic Graph (DAG) of the assumed causal relations between exposure, outcome (in this example 40m FPWT), and confounders in the sensitivity analysis. Red lines and variables reflect possible confounding paths. Green line reflects the assumed causal paths, and blue variables indicate intermediate factors.

**Supplementary Table S1.** Baseline characteristics of participants assessed immediately after the program and participants lost to follow-up for the main outcome (40-m FPWT).

|                                                         | No comorbidities                       |                                    | Comorbidities                          |                                    |
|---------------------------------------------------------|----------------------------------------|------------------------------------|----------------------------------------|------------------------------------|
|                                                         | Assessed at follow-up<br>n=7,993 (66%) | Lost to follow-up<br>n=4,135 (34%) | Assessed at follow-up<br>n=7,943 (64%) | Lost to follow-up<br>n=4,442 (36%) |
| Most affected joint, n (%)                              |                                        |                                    |                                        |                                    |
| Knee                                                    | 5,827 (73)                             | 3,096 (75)                         | 6,027 (76)                             | 3,321 (75)                         |
| Hip                                                     | 2,166 (27)                             | 1,039 (25)                         | 1,916 (24)                             | 1,121 (25)                         |
| Age, years (SD)                                         | 63.2 (9.9)                             | 62.2 (10.5)                        | 66.6 (8.7)                             | 66.1 (9.4)                         |
| Female, n (%)                                           | 5,987 (75)                             | 3,065 (74)                         | 5,658 (71)                             | 3,089 (70)                         |
| BMI, kg/m <sup>2</sup> (SD) <sup>a</sup>                | 27.2 (4.8)                             | 27.5 (5.0)                         | 28.9 (5.2)                             | 29.3 (5.6)                         |
| Educational level, n (%) <sup>b</sup>                   |                                        |                                    |                                        |                                    |
| Primary school                                          | 1,171 (15)                             | 567 (14)                           | 1,579 (20)                             | 926 (21)                           |
| Secondary school                                        | 895 (11)                               | 434 (11)                           | 908 (11)                               | 499 (11)                           |
| Short-term education <sup>c</sup>                       | 1,586 (20)                             | 787 (19)                           | 1,584 (20)                             | 862 (19)                           |
| Middle-term education <sup>d</sup>                      | 3,392 (42)                             | 1,753 (42)                         | 3,073 (39)                             | 1,652 (37)                         |
| Long-term education <sup>e</sup>                        | 948 (12)                               | 593 (14)                           | 795 (10)                               | 498 (11)                           |
| Born outside Denmark, n (%) <sup>f</sup>                | 294 (4)                                | 172 (4)                            | 276 (3)                                | 175 (4)                            |
| Living alone, n (%) <sup>g</sup>                        | 1,777 (22)                             | 974 (24)                           | 2,160 (27)                             | 1,305 (29)                         |
| Physical activity level, n (%) <sup>h</sup>             |                                        |                                    |                                        |                                    |
| Inactive                                                | 107 (1)                                | 93 (2)                             | 161 (2)                                | 163 (4)                            |
| Low (e.g. walking, limited housework)                   | 1,899 (24)                             | 1,147 (28)                         | 2,460 (31)                             | 1,608 (36)                         |
| Moderate (e.g. swimming, unlimited housework)           | 2,692 (34)                             | 1,315 (32)                         | 2,696 (34)                             | 1,401 (32)                         |
| High (e.g. prolonged biking and fitness)                | 2,658 (33)                             | 1,212 (29)                         | 2,213 (28)                             | 1,042 (23)                         |
| Very high (e.g. running, tennis and skiing)             | 629 (8)                                | 366 (9)                            | 410 (5)                                | 222 (5)                            |
| Pain in other knee or hip joints, n (%)                 |                                        |                                    |                                        |                                    |
| No                                                      | 3,533 (44)                             | 1,854 (45)                         | 3,283 (41)                             | 1,865 (42)                         |
| Bilateral joint (from most affected joint)              | 2,812 (35)                             | 1,482 (36)                         | 2,860 (36)                             | 1,542 (35)                         |
| Hip or knee <sup>i</sup>                                | 1,336 (17)                             | 630 (15)                           | 1,439 (18)                             | 795 (18)                           |
| Bilateral joint and hip or knee <sup>i</sup>            | 312 (4)                                | 169 (4)                            | 361 (5)                                | 240 (5)                            |
| Number of bodily pain areas, n (%)                      |                                        |                                    |                                        |                                    |
| 0                                                       | 245 (3)                                | 111 (3)                            | 205 (3)                                | 118 (3)                            |
| 1-2                                                     | 3,765 (47)                             | 1,891 (46)                         | 3,477 (44)                             | 1,833 (41)                         |
| 3-4                                                     | 2,156 (27)                             | 1,134 (27)                         | 2,232 (28)                             | 1,210 (27)                         |
| 5-6                                                     | 905 (11)                               | 465 (11)                           | 923 (12)                               | 545 (12)                           |
| 7 or more                                               | 922 (12)                               | 534 (13)                           | 1,106 (14)                             | 736 (17)                           |
| Use of analgesics within recent 3 months <sup>j</sup>   | 4,791 (60)                             | 2,476 (60)                         | 5,223 (66)                             | 2,925 (66)                         |
| QoL (EQ-5D-5L, -0.624 to 1.000), mean (SD) <sup>k</sup> | 0.728 (0.104)                          | 0.716 (0.112)                      | 0.710 (0.110)                          | 0.691 (0.111)                      |
| Pain intensity (VAS, 0-100 mm), mean (SD) <sup>l</sup>  | 45.2 (21.5)                            | 47.1 (22.3)                        | 47.9 (21.4)                            | 50.8 (22.5)                        |
| 40m Fast-Paced Walk Test, m/s (SD) <sup>m</sup>         | 1.57 (0.33)                            | 1.55 (0.34)                        | 1.45 (0.32)                            | 1.41 (0.34)                        |

n: Number, SD: Standard Deviation, BMI: Body Mass Index (kg/m<sup>2</sup>), VAS: Visual Analogue Scale, QoL: Quality of Life. <sup>a</sup>69 missing observations, <sup>b</sup>11 missing observations, <sup>c</sup>under 3 years after secondary school, <sup>d</sup>3-4 years after secondary school, <sup>e</sup>at least 5 years after secondary school. <sup>f</sup>7 missing observations, <sup>g</sup>7 missing observations, <sup>h</sup>19 missing observations, <sup>i</sup>hip if most affected joint is knee and vice versa, <sup>j</sup>at least one of the following: Acetaminophen, oral or topical Non-Steroidal Anti-inflammatory Drug (NSAID), Morphine, Tramadol, or Codeine, <sup>k</sup>21 missing observations, <sup>l</sup>30 missing observations, <sup>m</sup>1,350 missing observations.

**Supplementary Table S2.** Baseline characteristics of participants within strata of comorbidities (1-6 most prevalent strata of comorbidities in GLA:D).

|                                                                     | <b>No Comor</b><br>(n = 12,128) | <b>HT</b><br>(n = 5,716) | <b>HT + DM</b><br>(n = 729) | <b>HT + Hea</b><br>(n = 630) | <b>Respiratory</b><br>(n = 558) | <b>HD</b><br>(n = 551) | <b>Neurologic</b><br>(n = 508) |
|---------------------------------------------------------------------|---------------------------------|--------------------------|-----------------------------|------------------------------|---------------------------------|------------------------|--------------------------------|
| Most affected joint, n (%)                                          |                                 |                          |                             |                              |                                 |                        |                                |
| Knee                                                                | 8,923 (74)                      | 4,375 (77)               | 557 (76)                    | 465 (74)                     | 399 (72)                        | 409 (74)               | 370 (73)                       |
| Hip                                                                 | 3,205 (26)                      | 1,341 (23)               | 172 (26)                    | 165 (26)                     | 159 (28)                        | 142 (26)               | 138 (27)                       |
| Age, years (SD)                                                     | 62.9 (10.1)                     | 66.8 (8.5)               | 67.2 (8.0)                  | 70.8 (7.4)                   | 65.4 (8.7)                      | 69.7 (8.3)             | 61.9 (9.7)                     |
| Female, n (%)                                                       | 9,052 (75)                      | 4,160 (73)               | 467 (64)                    | 352 (56)                     | 423 (76)                        | 298 (54)               | 421 (83)                       |
| BMI, kg/m <sup>2</sup> (SD) <sup>a</sup>                            | 27.3 (4.9)                      | 29.4 (5.3)               | 32.0 (5.8)                  | 28.8 (4.6)                   | 27.7 (5.3)                      | 27.1 (4.4)             | 27.4 (5.3)                     |
| Educational level, n (%) <sup>b</sup>                               |                                 |                          |                             |                              |                                 |                        |                                |
| Primary school                                                      | 1,738 (14)                      | 1,166 (20)               | 166 (23)                    | 136 (22)                     | 96 (17)                         | 90 (16)                | 78 (15)                        |
| Secondary school                                                    | 1,329 (11)                      | 662 (12)                 | 102 (14)                    | 87 (14)                      | 49 (9)                          | 42 (8)                 | 50 (10)                        |
| Short-term education <sup>c</sup>                                   | 2,373 (20)                      | 1,145 (20)               | 152 (21)                    | 91 (14)                      | 119 (21)                        | 89 (16)                | 115 (23)                       |
| Middle-term education <sup>d</sup>                                  | 5,145 (42)                      | 2,143 (38)               | 255 (35)                    | 236 (37)                     | 235 (42)                        | 245 (44)               | 218 (84)                       |
| Long-term education <sup>e</sup>                                    | 1,541 (13)                      | 597 (10)                 | 54 (7)                      | 80 (13)                      | 59 (11)                         | 85 (15)                | 47 (9)                         |
| Born outside Denmark, n (%) <sup>f</sup>                            | 466 (4)                         | 165 (3)                  | 26 (4)                      | 17 (3)                       | 21 (4)                          | 15 (3)                 | 14 (3)                         |
| Living alone, n (%) <sup>g</sup>                                    | 2,751 (23)                      | 1,562 (27)               | 230 (32)                    | 184 (29)                     | 153 (27)                        | 142 (26)               | 109 (21)                       |
| Physical activity level, n (%) <sup>h</sup>                         |                                 |                          |                             |                              |                                 |                        |                                |
| Inactive                                                            | 200 (2)                         | 126 (2)                  | 31 (4)                      | 21 (3)                       | 12 (2)                          | 11 (2)                 | 8 (2)                          |
| Low (e.g. walking and limited housework)                            | 3,046 (25)                      | 1,717 (30)               | 298 (41)                    | 226 (836)                    | 180 (32)                        | 139 (25)               | 159 (31)                       |
| Moderate (e.g. swimming and unlimited housework)                    | 4,007 (33)                      | 1,978 (35)               | 218 (30)                    | 192 (31)                     | 178 (32)                        | 191 (35)               | 176 (35)                       |
| High (e.g. prolonged biking and fitness)                            | 3,870 (32)                      | 1,609 (28)               | 149 (20)                    | 150 (24)                     | 155 (28)                        | 174 (32)               | 138 (27)                       |
| Very high (e.g. running, tennis and skiing)                         | 995 (8)                         | 283 (5)                  | 32 (49)                     | 40 (6)                       | 32 (6)                          | 35 (6)                 | 27 (5)                         |
| Pain in other knee or hip joints, n (%)                             |                                 |                          |                             |                              |                                 |                        |                                |
| No                                                                  | 5,387 (44)                      | 2,463 (43)               | 311 (43)                    | 276 (44)                     | 227 (41)                        | 234 (42)               | 204 (840)                      |
| Bilateral joint (from most affected joint)                          | 4,294 (35)                      | 2,039 (36)               | 259 (36)                    | 213 (834)                    | 191 (34)                        | 194 (35)               | 180 (35)                       |
| Hip or knee <sup>i</sup>                                            | 1,966 (16)                      | 974 (17)                 | 123 (17)                    | 107 (17)                     | 113 (20)                        | 101 (18)               | 98 (19)                        |
| Bilateral joint and hip or knee <sup>i</sup>                        | 481 (4)                         | 240 (4)                  | 36 (5)                      | 34 (5)                       | 27 (5)                          | 22 (4)                 | 26 (5)                         |
| Number of bodily pain areas, n (%)                                  |                                 |                          |                             |                              |                                 |                        |                                |
| 0                                                                   | 356 (3)                         | 174 (3)                  | 11 (2)                      | 12 (2)                       | 13 (2)                          | 21 (4)                 | 10 (2)                         |
| 1-2                                                                 | 5,656 (47)                      | 2,672 (47)               | 318 (44)                    | 279 (44)                     | 213 (38)                        | 253 (46)               | 191 (38)                       |
| 3-4                                                                 | 3,290 (27)                      | 1,587 (28)               | 205 (28)                    | 195 (31)                     | 165 (30)                        | 156 (28)               | 131 (26)                       |
| 5-6                                                                 | 1,370 (11)                      | 632 (11)                 | 86 (12)                     | 69 (11)                      | 79 (14)                         | 51 (9)                 | 61 (12)                        |
| 7 or more                                                           | 1,456 (12)                      | 651 (11)                 | 109 (15)                    | 75 (12)                      | 88 (16)                         | 70 (13)                | 115 (23)                       |
| Use of analgesics within recent 3 months <sup>j</sup>               | 7,267 (60)                      | 3,781 (66)               | 514 (71)                    | 397 (63)                     | 392 (70)                        | 284 (52)               | 324 (64)                       |
| Quality of life (EQ-5D-5L, -0.624 to 1.000), mean (SD) <sup>k</sup> | 0.724 (0.107)                   | 0.715 (0.111)            | 0.700 (0.109)               | 0.702 (0.102)                | 0.708 (0.105)                   | 0.719 (0.103)          | 0.700 (0.118)                  |
| Pain intensity (VAS, 0-100 mm), mean (SD) <sup>l</sup>              | 45.9 (21.8)                     | 48.1 (22.0)              | 50.6 (21.7)                 | 49.2 (20.9)                  | 48.6 (21.0)                     | 45.4 (20.7)            | 49.8 (22.0)                    |
| 40m Fast-Paced Walk Test, m/s (SD) <sup>m</sup>                     | 1.56 (0.33)                     | 1.44 (0.31)              | 1.33 (0.32)                 | 1.38 (0.31)                  | 1.49 (0.32)                     | 1.47 (0.34)            | 1.50 (0.34)                    |

n: Number, SD: Standard Deviation, BMI: Body Mass Index (kg/m<sup>2</sup>), VAS: Visual Analogue Scale. Comor: Comorbidities, HT: Hypertension, DM: Diabetes mellitus 1 and 2, HD: Heart diseases. <sup>a</sup>69 missing observations, <sup>b</sup>11 missing observations, <sup>c</sup>under 3 years after secondary school, <sup>d</sup>3-4 years after secondary school, <sup>e</sup>at least 5 years after secondary school. <sup>f</sup>7 missing observations, <sup>g</sup>7 missing observations, <sup>h</sup>19 missing observations, <sup>i</sup>hip if most affected joint is knee and vice versa, <sup>j</sup>at least one of the following: Acetaminophen, oral or topical

| Non-Steroidal Anti-inflammatory Drug (NSAID), Morphine, Tramadol, or Codeine, <sup>k</sup> 21 missing observations, <sup>l</sup> 30 missing observations, <sup>m</sup> 1350 missing observations. |                        |                           |                                |                        |                               |                             |                              |
|---------------------------------------------------------------------------------------------------------------------------------------------------------------------------------------------------|------------------------|---------------------------|--------------------------------|------------------------|-------------------------------|-----------------------------|------------------------------|
| <b>Continues on next page</b>                                                                                                                                                                     |                        |                           |                                |                        |                               |                             |                              |
| <b>Supplementary Table S2 continued. (7-13 most prevalent strata of comorbidities in GLA:D).</b>                                                                                                  |                        |                           |                                |                        |                               |                             |                              |
|                                                                                                                                                                                                   | <b>RA</b><br>(n = 501) | <b>Ulcer</b><br>(n = 447) | <b>Depression</b><br>(n = 408) | <b>DM</b><br>(n = 358) | <b>HT + Resp</b><br>(n = 323) | <b>HT + RA</b><br>(n = 275) | <b>HT + Neu</b><br>(n = 274) |
| Most affected joint, n (%)                                                                                                                                                                        |                        |                           |                                |                        |                               |                             |                              |
| Knee                                                                                                                                                                                              | 363 (72)               | 336 (75)                  | 305 (75)                       | 287 (80)               | 239 (74)                      | 210 (76)                    | 206 (75)                     |
| Hip                                                                                                                                                                                               | 138 (28)               | 111 (25)                  | 103 (25)                       | 71 (20)                | 84 (26)                       | 65 (24)                     | 68 (25)                      |
| Age, years (SD)                                                                                                                                                                                   | 64.3 (9.4)             | 62.2 (10.0)               | 59.7 (10.2)                    | 66.1 (8.9)             | 69.3 (8.0)                    | 67.1 (8.4)                  | 65.9 (8.7)                   |
| Female, n (%)                                                                                                                                                                                     | 334 (67)               | 351 (79)                  | 330 (81)                       | 205 (57)               | 248 (77)                      | 186 (68)                    | 209 (76)                     |
| BMI, kg/m <sup>2</sup> (SD) <sup>a</sup>                                                                                                                                                          | 27.3 (4.8)             | 27.9 (4.6)                | 28.8 (5.6)                     | 29.9 (5.2)             | 30.0 (5.6)                    | 29.6 (4.9)                  | 29.1 (6.1)                   |
| Educational level, n (%) <sup>b</sup>                                                                                                                                                             |                        |                           |                                |                        |                               |                             |                              |
| Primary school                                                                                                                                                                                    | 98 (20)                | 66 (15)                   | 75 (18)                        | 82 (23)                | 93 (29)                       | 58 (21)                     | 65 (24)                      |
| Secondary school                                                                                                                                                                                  | 69 (14)                | 50 (11)                   | 52 (13)                        | 35 (10)                | 32 (10)                       | 34 (12)                     | 40 (15)                      |
| Short-term education <sup>c</sup>                                                                                                                                                                 | 90 (18)                | 104 (23)                  | 83 (20)                        | 78 (22)                | 62 (19)                       | 54 (20)                     | 51 (19)                      |
| Middle-term education <sup>d</sup>                                                                                                                                                                | 176 (35)               | 186 (42)                  | 162 (40)                       | 135 (38)               | 113 (35)                      | 103 (38)                    | 86 (31)                      |
| Long-term education <sup>e</sup>                                                                                                                                                                  | 66 (13)                | 40 (9)                    | 36 (9)                         | 28 (8)                 | 23 (7)                        | 25 (9)                      | 32 (12)                      |
| Born outside Denmark, n (%) <sup>f</sup>                                                                                                                                                          | 42 (8)                 | 33 (7)                    | 35 (9)                         | 19 (5)                 | 9 (3)                         | 10 (4)                      | 6 (2)                        |
| Living alone, n (%) <sup>g</sup>                                                                                                                                                                  | 121 (24)               | 106 (24)                  | 163 (40)                       | 100 (28)               | 115 (36)                      | 80 (29)                     | 80 (29)                      |
| Physical activity level, n (%) <sup>h</sup>                                                                                                                                                       |                        |                           |                                |                        |                               |                             |                              |
| Inactive                                                                                                                                                                                          | 8 (2)                  | 13 (3)                    | 17 (4)                         | 15 (4)                 | 9 (3)                         | 7 (3)                       | 8 (3)                        |
| Low (e.g. walking and limited housework)                                                                                                                                                          | 170 (34)               | 151 (34)                  | 162 (40)                       | 105 (29)               | 135 (42)                      | 99 (36)                     | 108 (39)                     |
| Moderate (e.g. swimming and unlimited housework)                                                                                                                                                  | 144 (29)               | 138 (31)                  | 120 (29)                       | 124 (35)               | 108 (34)                      | 93 (34)                     | 91 (33)                      |
| High (e.g. prolonged biking and fitness)                                                                                                                                                          | 144 (29)               | 119 (27)                  | 82 (20)                        | 94 (26)                | 63 (20)                       | 67 (24)                     | 54 (20)                      |
| Very high (e.g. running, tennis and skiing)                                                                                                                                                       | 35 (7)                 | 26 (6)                    | 27 (7)                         | 19 (5)                 | 7 (2)                         | 9 (3)                       | 13 (5)                       |
| Pain in other knee or hip joints, n (%)                                                                                                                                                           |                        |                           |                                |                        |                               |                             |                              |
| No                                                                                                                                                                                                | 208 (42)               | 150 (34)                  | 155 (38)                       | 175 (49)               | 113 (35)                      | 115 (42)                    | 102 (37)                     |
| Bilateral joint (from most affected joint)                                                                                                                                                        | 176 (35)               | 175 (39)                  | 143 (35)                       | 111 (31)               | 121 (37)                      | 87 (32)                     | 103 (38)                     |
| Hip or knee <sup>i</sup>                                                                                                                                                                          | 88 (18)                | 98 (22)                   | 77 (19)                        | 53 (15)                | 65 (20)                       | 63 (23)                     | 52 (19)                      |
| Bilateral joint and hip or knee <sup>i</sup>                                                                                                                                                      | 29 (6)                 | 24 (5)                    | 33 (8)                         | 19 (5)                 | 24 (7)                        | 10 (4)                      | 17 (6)                       |
| Number of bodily pain areas, n (%)                                                                                                                                                                |                        |                           |                                |                        |                               |                             |                              |
| 0                                                                                                                                                                                                 | 5 (1)                  | 9 (2)                     | 15 (4)                         | 10 (3)                 | 7 (2)                         | 8 (3)                       | 5 (2)                        |
| 1-2                                                                                                                                                                                               | 176 (35)               | 139 (31)                  | 130 (32)                       | 174 (49)               | 116 (36)                      | 105 (38)                    | 109 (40)                     |
| 3-4                                                                                                                                                                                               | 126 (25)               | 120 (27)                  | 98 (24)                        | 92 (26)                | 104 (32)                      | 72 (26)                     | 76 (28)                      |
| 5-6                                                                                                                                                                                               | 90 (18)                | 57 (13)                   | 72 (18)                        | 37 (10)                | 31 (10)                       | 33 (12)                     | 33 (12)                      |
| 7 or more                                                                                                                                                                                         | 104 (21)               | 122 (27)                  | 93 (23)                        | 45 (13)                | 65 (20)                       | 57 (21)                     | 51 (19)                      |
| Use of analgesics within recent 3 months <sup>j</sup>                                                                                                                                             | 322 (64)               | 293 (66)                  | 278 (68)                       | 224 (63)               | 230 (71)                      | 181 (66)                    | 191 (69)                     |
| Quality of life (EQ-5D-5L, -0.624 to 1.000), mean (SD) <sup>k</sup>                                                                                                                               | 0.695 (0.110)          | 0.688 (0.120)             | 0.611 (0.155)                  | 0.706 (0.117)          | 0.700 (0.102)                 | 0.704 (0.108)               | 0.700 (0.125)                |
| Pain intensity (VAS, 0-100 mm), mean (SD) <sup>l</sup>                                                                                                                                            | 49.5 (21.7)            | 51.8 (22.6)               | 52.7 (22.0)                    | 48.5 (22.4)            | 49.1 (19.6)                   | 49.8 (24.1)                 | 48.3 (21.9)                  |
| 40m Fast-Paced Walk Test, m/s (SD) <sup>m</sup>                                                                                                                                                   | 1.49 (0.32)            | 1.52 (0.35)               | 1.46 (0.32)                    | 1.41 (0.32)            | 1.34 (0.30)                   | 1.41 (0.35)                 | 1.41 (0.32)                  |

n: Number, SD: Standard Deviation, BMI: Body Mass Index (kg/m<sup>2</sup>), VAS: Visual Analogue Scale. HT: Hypertension, RA: Rheumatoid Arthritis, Resp: Respiratory diseases, Neu:

Neurologic diseases. <sup>a</sup>69 missing observations, <sup>b</sup>11 missing observations, <sup>c</sup>under 3 years after secondary school, <sup>d</sup>3-4 years after secondary school, <sup>e</sup>at least 5 years after secondary school. <sup>f</sup>7 missing observations, <sup>g</sup>7 missing observations, <sup>h</sup>19 missing observations, <sup>i</sup>hip if most affected joint is knee and vice versa, <sup>j</sup>at least one of the following: Acetaminophen, oral or topical Non-Steroidal Anti-inflammatory Drug (NSAID), Morphine, Tramadol, or Codeine, <sup>k</sup>21 missing observations, <sup>l</sup>30 missing observations, <sup>m</sup>1350 missing observations.

**Continues on next page**

**Supplementary Table S2 continued. (14-20 most prevalent strata of comorbidities in GLA:D).**

|                                                                     | <b>HT + Ulcer</b><br>(n = 254) | <b>Cancer</b><br>(n = 234) | <b>HT + Dep</b><br>(n = 203) | <b>HT + Can</b><br>(n = 137) | <b>HT + HD +<br/>DM</b> (n = 117) | <b>Anaemia</b><br>(n = 83) | <b>HT + Ren</b><br>(n = 79) |
|---------------------------------------------------------------------|--------------------------------|----------------------------|------------------------------|------------------------------|-----------------------------------|----------------------------|-----------------------------|
| Most affected joint, n (%)                                          |                                |                            |                              |                              |                                   |                            |                             |
| Knee                                                                | 186 (73)                       | 176 (75)                   | 155 (76)                     | 103 (75)                     | 84 (72)                           | 65 (78)                    | 58 (73)                     |
| Hip                                                                 | 68 (27)                        | 58 (25)                    | 48 (24)                      | 34 (25)                      | 33 (28)                           | 18 (22)                    | 21 (27)                     |
| Age, years (SD)                                                     | 68.0 (9.1)                     | 67.9 (8.8)                 | 63.6 (10.3)                  | 70.9 (6.7)                   | 70.3 (7.1)                        | 64.8 (10.3)                | 66.1 (10.5)                 |
| Female, n (%)                                                       | 204 (80)                       | 140 (60)                   | 169 (83)                     | 72 (44)                      | 52 (44)                           | 71 (86)                    | 55 (70)                     |
| BMI, kg/m <sup>2</sup> (SD) <sup>a</sup>                            | 29.1 (5.1)                     | 27.0 (4.5)                 | 30.6 (5.9)                   | 28.7 (4.6)                   | 31.1 (4.7)                        | 27.5 (5.3)                 | 30.1 (6.4)                  |
| Educational level, n (%) <sup>b</sup>                               |                                |                            |                              |                              |                                   |                            |                             |
| Primary school                                                      | 64 (25)                        | 36 (15)                    | 50 (25)                      | 27 (20)                      | 30 (26)                           | 14 (17)                    | 15 (19)                     |
| Secondary school                                                    | 29 (12)                        | 15 (6)                     | 21 (10)                      | 14 (10)                      | 10 (9)                            | 5 (6)                      | 9 (11)                      |
| Short-term education <sup>c</sup>                                   | 50 (20)                        | 40 (17)                    | 49 (24)                      | 25 (18)                      | 21 (18)                           | 16 (19)                    | 12 (15)                     |
| Middle-term education <sup>d</sup>                                  | 89 (35)                        | 104 (44)                   | 66 (33)                      | 51 (37)                      | 45 (38)                           | 41 (49)                    | 36 (46)                     |
| Long-term education <sup>e</sup>                                    | 20 (8)                         | 39 (17)                    | 17 (8)                       | 20 (15)                      | 11 (9)                            | 7 (8)                      | 7 (9)                       |
| Born outside Denmark, n (%) <sup>f</sup>                            | 13 (5)                         | 9 (4)                      | 4 (2)                        | 3 (2)                        | 1 (1)                             | 4 (5)                      | 5 (6)                       |
| Living alone, n (%) <sup>g</sup>                                    | 83 (33)                        | 51 (22)                    | 78 (38)                      | 40 (29)                      | 33 (28)                           | 20 (24)                    | 15 (19)                     |
| Physical activity level, n (%) <sup>h</sup>                         |                                |                            |                              |                              |                                   |                            |                             |
| Inactive                                                            | 9 (4)                          | 3 (1)                      | 11 (5)                       | 3 (2)                        | 9 (8)                             | 27 (33)                    | 3 (4)                       |
| Low (e.g. walking and limited housework)                            | 97 (38)                        | 61 (26)                    | 98 (48)                      | 48 (35)                      | 56 (48)                           | 0 (0)                      | 32 (41)                     |
| Moderate (e.g. swimming and unlimited housework)                    | 89 (35)                        | 77 (33)                    | 59 (29)                      | 42 (31)                      | 25 (21)                           | 29 (35)                    | 25 (32)                     |
| High (e.g. prolonged biking and fitness)                            | 51 (20)                        | 75 (32)                    | 34 (17)                      | 36 (26)                      | 22 (19)                           | 23 (28)                    | 16 (20)                     |
| Very high (e.g. running, tennis and skiing)                         | 8 (3)                          | 18 (8)                     | 1 (0)                        | 8 (6)                        | 5 (4)                             | 4 (5)                      | 3 (4)                       |
| Pain in other knee or hip joints, n (%)                             |                                |                            |                              |                              |                                   |                            |                             |
| No                                                                  | 71 (28)                        | 103 (44)                   | 73 (36)                      | 56 (41)                      | 51 (44)                           | 34 (41)                    | 27 (34)                     |
| Bilateral joint (from most affected joint)                          | 96 (38)                        | 79 (34)                    | 75 (37)                      | 54 (39)                      | 35 (30)                           | 33 (40)                    | 38 (48)                     |
| Hip or knee <sup>i</sup>                                            | 67 (26)                        | 39 (17)                    | 42 (21)                      | 23 (17)                      | 24 (21)                           | 15 (18)                    | 12 (15)                     |
| Bilateral joint and hip or knee <sup>i</sup>                        | 20 (8)                         | 13 (6)                     | 13 (6)                       | 4 (3)                        | 7 (6)                             | 1 (1)                      | 2 (3)                       |
| Number of bodily pain areas, n (%)                                  |                                |                            |                              |                              |                                   |                            |                             |
| 0                                                                   | 4 (2)                          | 7 (3)                      | 2 (1)                        | 3 (2)                        | 3 (3)                             | 34 (41)                    | 4 (5)                       |
| 1-2                                                                 | 77 (30)                        | 110 (47)                   | 71 (35)                      | 67 (49)                      | 50 (43)                           | 0 (0)                      | 26 (33)                     |
| 3-4                                                                 | 77 (30)                        | 68 (29)                    | 62 (31)                      | 29 (21)                      | 30 (26)                           | 22 (27)                    | 27 (34)                     |
| 5-6                                                                 | 34 (13)                        | 19 (8)                     | 29 (14)                      | 19 (14)                      | 14 (12)                           | 13 (16)                    | 9 (11)                      |
| 7 or more                                                           | 62 (24)                        | 30 (13)                    | 39 (19)                      | 19 (14)                      | 20 (17)                           | 14 (17)                    | 13 (16)                     |
| Use of analgesics within recent 3 months <sup>j</sup>               | 187 (74)                       | 141 (60)                   | 149 (73)                     | 88 (64)                      | 72 (62)                           | 48 (58)                    | 52 (66)                     |
| Quality of life (EQ-5D-5L, -0.624 to 1.000), mean (SD) <sup>k</sup> | 0.694 (0.118)                  | 0.710 (0.111)              | 0.614 (0.151)                | 0.716 (0.090)                | 0.676 (0.109)                     | 0.727 (0.084)              | 0.706 (0.096)               |
| Pain intensity (VAS, 0-100 mm), mean (SD) <sup>l</sup>              | 53.3 (20.8)                    | 47.3 (21.7)                | 54.0 (21.6)                  | 46.9 (21.4)                  | 52.7 (21.0)                       | 48.6 (22.4)                | 48.8 (25.7)                 |

|                                                                                                                                                                                                                                                                                                                                                                                                                                                                                                                                                                                                                                                                                                                                                                                                                                                                                                                                     |             |             |             |             |             |             |             |
|-------------------------------------------------------------------------------------------------------------------------------------------------------------------------------------------------------------------------------------------------------------------------------------------------------------------------------------------------------------------------------------------------------------------------------------------------------------------------------------------------------------------------------------------------------------------------------------------------------------------------------------------------------------------------------------------------------------------------------------------------------------------------------------------------------------------------------------------------------------------------------------------------------------------------------------|-------------|-------------|-------------|-------------|-------------|-------------|-------------|
| 40m Fast-Paced Walk Test, m/s (SD) <sup>m</sup>                                                                                                                                                                                                                                                                                                                                                                                                                                                                                                                                                                                                                                                                                                                                                                                                                                                                                     | 1.40 (0.33) | 1.51 (0.33) | 1.34 (0.32) | 1.40 (0.31) | 1.29 (0.29) | 1.51 (0.32) | 1.48 (0.37) |
| <p>n: Number, SD: Standard Deviation, BMI: Body Mass Index (kg/m<sup>2</sup>), VAS: Visual Analogue Scale. HT: Hypertension, DM: Diabetes mellitus 1 and 2, HD: Heart diseases, Can: Cancer, Dep: Depression, Ren: Renal or liver diseases, <sup>a</sup>69 missing observations, <sup>b</sup>11 missing observations, <sup>c</sup>under 3 years after secondary school, <sup>d</sup>3-4 years after secondary school, <sup>e</sup>at least 5 years after secondary school. <sup>f</sup>7 missing observations, <sup>g</sup>7 missing observations, <sup>h</sup>19 missing observations, <sup>i</sup>hip if most affected joint is knee and vice versa, <sup>j</sup>at least one of the following: Acetaminophen, oral or topical Non-Steroidal Anti-inflammatory Drug (NSAID), Morphine, Tramadol, or Codeine, <sup>k</sup>21 missing observations, <sup>l</sup>30 missing observations, <sup>m</sup>1350 missing observations.</p> |             |             |             |             |             |             |             |

**Supplementary Table S3.** Sensitivity analyses excluding the confounders bodily pain, pain in other knee or hip joints, physical activity, and analgesics in the adjusted analysis for difference in change in 40-meter Fast-Paced Walk Test (40-m FPWT) from baseline to immediately after exercise therapy and education in between participants with and without comorbidities.

|                                                                                                                                                                                                                                                                                                                                                      | <b>Change 3 mo. 40-m FPWT</b><br>Mean m/s (95% CI)                     |
|------------------------------------------------------------------------------------------------------------------------------------------------------------------------------------------------------------------------------------------------------------------------------------------------------------------------------------------------------|------------------------------------------------------------------------|
| No comor, n=12,128                                                                                                                                                                                                                                                                                                                                   | 0.12 (0.12 to 0.13)                                                    |
|                                                                                                                                                                                                                                                                                                                                                      |                                                                        |
|                                                                                                                                                                                                                                                                                                                                                      | <b>Adjusted* difference in change at 3 months</b><br>Mean m/s (95% CI) |
| HT, n=5,716                                                                                                                                                                                                                                                                                                                                          | -0.00 (-0.01 to 0.01)                                                  |
| HT + DM, n=729                                                                                                                                                                                                                                                                                                                                       | 0.00 (-0.02 to 0.02)                                                   |
| HT + HD, n=630                                                                                                                                                                                                                                                                                                                                       | -0.01 (-0.03 to 0.01)                                                  |
| Resp, n=558                                                                                                                                                                                                                                                                                                                                          | -0.01 (-0.03 to 0.01)                                                  |
| HD, n=551                                                                                                                                                                                                                                                                                                                                            | -0.01 (-0.03 to 0.01)                                                  |
| Neu, n=508                                                                                                                                                                                                                                                                                                                                           | 0.00 (-0.02 to 0.02)                                                   |
| RA, n=501                                                                                                                                                                                                                                                                                                                                            | 0.02 (-0.00 to 0.04)                                                   |
| Ulcer, n=447                                                                                                                                                                                                                                                                                                                                         | -0.01 (-0.04 to 0.01)                                                  |
| Dep, n=408                                                                                                                                                                                                                                                                                                                                           | 0.01 (-0.02 to 0.04)                                                   |
| DM, n=358                                                                                                                                                                                                                                                                                                                                            | -0.01 (-0.04 to 0.01)                                                  |
| HT + Resp, n=323                                                                                                                                                                                                                                                                                                                                     | -0.03 (-0.05 to 0.00)                                                  |
| HT + RA, n=275                                                                                                                                                                                                                                                                                                                                       | -0.03 (-0.06 to 0.00)                                                  |
| HT + Neu, n=274                                                                                                                                                                                                                                                                                                                                      | 0.01 (-0.02 to 0.04)                                                   |
| HT + Ulcer, n=254                                                                                                                                                                                                                                                                                                                                    | 0.02 (-0.01 to 0.05)                                                   |
| Cancer, n=234                                                                                                                                                                                                                                                                                                                                        | 0.01 (-0.02 to 0.04)                                                   |
| HT + Dep, n=203                                                                                                                                                                                                                                                                                                                                      | 0.01 (-0.02 to 0.05)                                                   |
| HT + Cancer, n=137                                                                                                                                                                                                                                                                                                                                   | -0.01 (-0.05 to 0.04)                                                  |
| HT + HD + DM, n=117                                                                                                                                                                                                                                                                                                                                  | 0.01 (-0.04 to 0.06)                                                   |
| Anemia, n=83                                                                                                                                                                                                                                                                                                                                         | -0.06 (-0.11 to -0.1)                                                  |
| HT + Ren/Liv. n=79                                                                                                                                                                                                                                                                                                                                   | -0.03 (-0.08 to 0.02)                                                  |
|                                                                                                                                                                                                                                                                                                                                                      |                                                                        |
| <b>Number of comorbidities</b>                                                                                                                                                                                                                                                                                                                       |                                                                        |
| 1 comorbidity, n=9,441                                                                                                                                                                                                                                                                                                                               | -0.00 (-0.01 to 0.01)                                                  |
| 2 comorbidities, n=3,838                                                                                                                                                                                                                                                                                                                             | -0.00 (-0.01 to 0.00)                                                  |
| 3 comorbidities, n=1,173                                                                                                                                                                                                                                                                                                                             | -0.00 (-0.02 to 0.01)                                                  |
| ≥4 comorbidities, n=392                                                                                                                                                                                                                                                                                                                              | 0.00 (-0.02 to 0.03)                                                   |
| n: Number, CI: Confidence interval. Comor: Comorbidities, HT: Hypertension, DM: Diabetes mellitus 1 and 2, Resp: Respiratory disease, HD: Heart disease, Neu: Neurologic disease, RA: Rheumatoid arthritis, Dep: Depression, Ren/Liv: Renal and/or liver disease. *Adjusted for age, sex, BMI, educational level, not born in Denmark, civil status. |                                                                        |



**Supplementary Table S4.** Sensitivity analyses excluding the confounders bodily pain, pain in other knee or hip joints, physical activity, and analgesics in the adjusted analysis for differences in change in knee and hip pain (VAS) from baseline to immediately after, and 12 months after exercise therapy and education between participants with and without comorbidities.

|                                                                                                                                                                                                                                                                                                                                                      | <b>Change 3 mo. VAS</b><br>Mean mmm (95% CI)                                  | <b>Change 12 mo. VAS</b><br>Mean mm (95% CI)                                  |
|------------------------------------------------------------------------------------------------------------------------------------------------------------------------------------------------------------------------------------------------------------------------------------------------------------------------------------------------------|-------------------------------------------------------------------------------|-------------------------------------------------------------------------------|
| No comor, n=12,128                                                                                                                                                                                                                                                                                                                                   | -12.7 (-13.2 to -12.2)                                                        | -13.8 (-14.3 to -13.4)                                                        |
|                                                                                                                                                                                                                                                                                                                                                      |                                                                               |                                                                               |
|                                                                                                                                                                                                                                                                                                                                                      | <b>Adjusted * difference in <u>change</u> at 3 months</b><br>mean mm (95% CI) | <b>Adjusted* difference in <u>change</u> at 12 months</b><br>mean mm (95% CI) |
| HT, n=5,716                                                                                                                                                                                                                                                                                                                                          | 0.3 (-0.6 to 1.1)                                                             | 1.3 (0.4 to 2.2)                                                              |
| HT + DM, n=729                                                                                                                                                                                                                                                                                                                                       | 1.4 (-0.6 to 3.4)                                                             | 2.6 (0.4 to 4.8)                                                              |
| HT + HD, n=630                                                                                                                                                                                                                                                                                                                                       | 0.0 (-2.1 to 2.1)                                                             | 1.2 (-1.2 to 3.6)                                                             |
| Resp, n=558                                                                                                                                                                                                                                                                                                                                          | 0.2 (-2.1 to 2.5)                                                             | 1.6 (-1.0 to 4.1)                                                             |
| HD, n=551                                                                                                                                                                                                                                                                                                                                            | 3.6 (1.3 to 5.8)                                                              | 4.0 (1.4 to 6.7)                                                              |
| Neu, n=508                                                                                                                                                                                                                                                                                                                                           | -1.3 (-3.7 to 1.1)                                                            | -0.6 (-3.2 to 2.0)                                                            |
| RA, n=501                                                                                                                                                                                                                                                                                                                                            | -1.1 (-3.7 to 1.4)                                                            | -0.7 (-3.4 to 2.0)                                                            |
| Ulcer, n=447                                                                                                                                                                                                                                                                                                                                         | -1.1 (-3.8 to 1.6)                                                            | -0.2 (-3.1 to 2.7)                                                            |
| Dep, n=408                                                                                                                                                                                                                                                                                                                                           | 0.3 (-2.5 to 3.2)                                                             | 2.7 (-0.8 to 6.2)                                                             |
| DM, n=358                                                                                                                                                                                                                                                                                                                                            | 0.3 (-2.5 to 3.2)                                                             | -0.5 (-3.9 to 2.8)                                                            |
| HT + Resp, n=323                                                                                                                                                                                                                                                                                                                                     | 3.1 (0.1 to 6.0)                                                              | 0.5 (-3.0 to 3.9)                                                             |
| HT + RA, n=275                                                                                                                                                                                                                                                                                                                                       | 1.9 (-1.4 to 5.1)                                                             | 2.4 (-1.2 to 6.0)                                                             |
| HT + Neu, n=274                                                                                                                                                                                                                                                                                                                                      | 5.0 (1.7 to 8.3)                                                              | 7.1 (3.6 to 10.6)                                                             |
| HT + Ulcer, n=254                                                                                                                                                                                                                                                                                                                                    | -0.3 (-3.8 to 3.3)                                                            | 2.9 (-0.9 to 6.8)                                                             |
| Cancer, n=234                                                                                                                                                                                                                                                                                                                                        | 2.5 (-1.1 to 6.0)                                                             | 2.9 (-0.8 to 6.7)                                                             |
| HT + Dep, n=203                                                                                                                                                                                                                                                                                                                                      | -1.3 (-5.2 to 2.7)                                                            | 2.4 (-2.3 to 7.0)                                                             |
| HT + Cancer, n=137                                                                                                                                                                                                                                                                                                                                   | 5.4 (0.9 to 10.0)                                                             | 0.3 (-4.8 to 5.4)                                                             |
| HT + HD + DM, n=117                                                                                                                                                                                                                                                                                                                                  | 0.1 (-5.5 to 5.2)                                                             | -1.4 (-8.4 to 5.6)                                                            |
| Anemia, n=83                                                                                                                                                                                                                                                                                                                                         | -1.2 (-7.0 to 4.6)                                                            | -2.8 (-9.1 to 3.6)                                                            |
| HT + Ren/Liv. n=79                                                                                                                                                                                                                                                                                                                                   | -0.2 (-6.4 to 5.9)                                                            | 3.1 (-3.7 to 9.8)                                                             |
|                                                                                                                                                                                                                                                                                                                                                      |                                                                               |                                                                               |
| <b>Number of comorbidities</b>                                                                                                                                                                                                                                                                                                                       |                                                                               |                                                                               |
| 1 comorbidity, n=9,441                                                                                                                                                                                                                                                                                                                               | 0.2 (-0.5 to 0.9)                                                             | 1.1 (0.4 to 1.9)                                                              |
| 2 comorbidities, n=3,838                                                                                                                                                                                                                                                                                                                             | 1.4 (0.4 to 2.3)                                                              | 1.9 (0.9 to 2.9)                                                              |
| 3 comorbidities, n=1,173                                                                                                                                                                                                                                                                                                                             | 0.5 (-1.1 to 2.1)                                                             | 1.3 (-0.6 to 3.1)                                                             |
| ≥4 comorbidities, n=392                                                                                                                                                                                                                                                                                                                              | 2.7 (-0.1 to 5.5)                                                             | 0.3 (-3.1 to 3.8)                                                             |
| n: Number, CI: Confidence interval. Comor: Comorbidities, HT: Hypertension, DM: Diabetes mellitus 1 and 2, Resp: Respiratory disease, HD: Heart disease, Neu: Neurologic disease, RA: Rheumatoid arthritis, Dep: Depression, Ren/Liv: Renal and/or liver disease. *Adjusted for age, sex, BMI, educational level, not born in Denmark, civil status. |                                                                               |                                                                               |

**Supplementary Table S5.** Sensitivity analyses excluding the confounders bodily pain, pain in other knee or hip joints, physical activity, and analgesics in the adjusted analysis for differences in change in quality of life (EQ-5D-5L) from baseline to immediately after, and 12 months after exercise therapy and education between participants with and without comorbidities.

|                                | <b>Change 3 mo. EQ-5D-5L</b><br>Mean (95% CI)                              | <b>Change 12 mo. EQ-5D-5L</b><br>Mean (95% CI)                             |
|--------------------------------|----------------------------------------------------------------------------|----------------------------------------------------------------------------|
| No comor, n=12,128             | 0.039 (0.036 to 0.041)                                                     | 0.051 (0.048 to 0.053)                                                     |
|                                |                                                                            |                                                                            |
|                                | <b>Adjusted * difference in <u>change</u> at 3 months</b><br>mean (95% CI) | <b>Adjusted* difference in <u>change</u> at 12 months</b><br>mean (95% CI) |
| HT, n=5,716                    | -0.004 (-0.008 to 0.001)                                                   | -0.008 (-0.012 to -0.003)                                                  |
| HT + DM, n=729                 | -0.007 (-0.017 to 0.004)                                                   | -0.019 (-0.031 to -0.008)                                                  |
| HT + HD, n=630                 | -0.000 (-0.011 to 0.011)                                                   | -0.023 (-0.038 to -0.009)                                                  |
| Resp, n=558                    | 0.000 (-0.011 to 0.012)                                                    | -0.008 (-0.022 to 0.005)                                                   |
| HD, n=551                      | -0.014 (-0.025 to -0.003)                                                  | -0.015 (-0.029 to -0.002)                                                  |
| Neu, n=508                     | 0.001 (-0.011 to 0.014)                                                    | -0.001 (-0.015 to 0.013)                                                   |
| RA, n=501                      | 0.010 (-0.003 to 0.022)                                                    | -0.001 (-0.015 to 0.013)                                                   |
| Ulcer, n=447                   | 0.004 (-0.010 to 0.018)                                                    | -0.010 (-0.027 to 0.006)                                                   |
| Dep, n=408                     | 0.014 (-0.000 to 0.029)                                                    | 0.000 (-0.017 to 0.017)                                                    |
| DM, n=358                      | -0.002 (-0.018 to 0.012)                                                   | 0.010 (-0.007 to 0.027)                                                    |
| HT + Resp, n=323               | -0.007 (-0.022 to 0.009)                                                   | -0.002 (-0.019 to 0.015)                                                   |
| HT + RA, n=275                 | -0.002 (-0.019 to 0.015)                                                   | -0.008 (-0.028 to 0.011)                                                   |
| HT + Neu, n=274                | -0.012 (-0.030 to 0.005)                                                   | -0.032 (-0.051 to -0.012)                                                  |
| HT + Ulcer, n=254              | -0.001 (-0.019 to 0.016)                                                   | -0.014 (-0.034 to 0.005)                                                   |
| Cancer, n=234                  | -0.008 (-0.026 to 0.010)                                                   | -0.015 (-0.033 to 0.004)                                                   |
| HT + Dep, n=203                | 0.014 (-0.008 to 0.036)                                                    | 0.024 (-0.005 to 0.053)                                                    |
| HT + Cancer, n=137             | -0.023 (-0.045 to 0.000)                                                   | -0.003 (-0.028 to 0.022)                                                   |
| HT + HD + DM, n=117            | -0.012 (-0.039 to 0.016)                                                   | 0.022 (-0.010 to 0.054)                                                    |
| Anemia, n=83                   | -0.002 (-0.032 to 0.029)                                                   | 0.010 (-0.023 to 0.043)                                                    |
| HT + Ren/Liv. n=79             | 0.002 (-0.030 to 0.034)                                                    | -0.001 (-0.036 to 0.035)                                                   |
|                                |                                                                            |                                                                            |
| <b>Number of comorbidities</b> |                                                                            |                                                                            |
| 1 comorbidity, n=9,441         | -0.002 (-0.005 to 0.002)                                                   | -0.006 (-0.010 to -0.002)                                                  |
| 2 comorbidities, n=3,838       | -0.002 (-0.007 to 0.003)                                                   | -0.011 (-0.017 to -0.006)                                                  |
| 3 comorbidities, n=1,173       | -0.006 (-0.015 to 0.003)                                                   | -0.014 (-0.024 to -0.003)                                                  |
| ≥4 comorbidities, n=392        | 0.005 (-0.011 to 0.022)                                                    | -0.004 (-0.024 to 0.017)                                                   |

n: Number, CI: Confidence interval. Comor: Comorbidities, HT: Hypertension, DM: Diabetes mellitus 1 and 2, Resp: Respiratory disease, HD: Heart disease, Neu: Neurologic disease, RA: Rheumatoid arthritis, Dep: Depression, Ren/Liv: Renal and/or liver disease. \*Adjusted for age, sex, BMI, educational level, not born in Denmark, civil status.

**Supplementary Table S6.** Sensitivity analyses using only individuals with complete data at all time points (complete-case analysis) for 40-meter Fast-Paced Walk Test (40-m FPWT) differences at baseline, and changes immediately after exercise therapy and education in between participants with and without comorbidities.

|                                | <b>Baseline 40-m FPWT</b><br>Mean m/s (95% CI) | <b>3 mo. 40-m FPWT</b><br>Mean m/s (95% CI)    | <b>Change 3 mo. 40-m FPWT</b><br>Mean m/s (95% CI) |
|--------------------------------|------------------------------------------------|------------------------------------------------|----------------------------------------------------|
| No comor, n=7,840              | 1.57 (1.56 to 1.57)                            | 1.69 (1.68 to 1.70)                            | 0.13 (0.12 to 0.13)                                |
|                                |                                                |                                                |                                                    |
|                                | <b>Difference at <u>baseline</u></b>           | <b>Difference in <u>change</u> at 3 months</b> |                                                    |
|                                | Mean m/s<br>(95% CI)                           | Unadjusted mean m/s<br>(95% CI)                | Adjusted* mean m/s<br>(95% CI)                     |
| HT, n=3,772                    | -0.11 (-0.12 to -0.10)                         | -0.00 (-0.01 to 0.01)                          | -0.00 (-0.01 to 0.01)                              |
| HT + DM, n=470                 | -0.20 (-0.23 to -0.18)                         | -0.00 (-0.02 to 0.01)                          | 0.00 (-0.02 to 0.02)                               |
| HT + HD, n=391                 | -0.16 (-0.19 to -0.13)                         | -0.02 (-0.04 to 0.00)                          | -0.02 (-0.04 to 0.00)                              |
| Resp, n=361                    | -0.05 (-0.08 to -0.02)                         | -0.01 (-0.03 to 0.01)                          | -0.01 (-0.03 to 0.01)                              |
| HD, n=339                      | -0.08 (-0.12 to -0.05)                         | -0.01 (-0.04 to 0.02)                          | -0.02 (-0.04 to 0.01)                              |
| Neu, n=318                     | -0.06 (-0.09 to -0.03)                         | 0.00 (-0.02 to 0.02)                           | 0.00 (-0.02 to 0.02)                               |
| RA, n=292                      | -0.05 (-0.09 to -0.01)                         | 0.02 (-0.00 to 0.04)                           | 0.02 (-0.00 to 0.04)                               |
| Ulcer, n=264                   | -0.04 (-0.08 to -0.01)                         | -0.01 (-0.03 to 0.01)                          | -0.01 (-0.03 to 0.01)                              |
| Dep, n=225                     | -0.08 (-0.12 to -0.04)                         | 0.01 (-0.01 to 0.04)                           | 0.01 (-0.01 to 0.04)                               |
| DM, n=213                      | -0.12 (-0.16 to -0.08)                         | -0.01 (-0.04 to 0.01)                          | -0.01 (-0.04 to 0.01)                              |
| HT + Resp, n=193               | -0.20 (-0.25 to -0.16)                         | -0.03 (-0.05 to 0.00)                          | -0.03 (-0.06 to -0.00)                             |
| HT + RA, n=172                 | -0.14 (-0.18 to -0.09)                         | -0.03 (-0.06 to 0.00)                          | -0.03 (-0.06 to 0.00)                              |
| HT + Neu, n=159                | -0.14 (-0.19 to -0.09)                         | 0.00 (-0.03 to 0.04)                           | 0.01 (-0.03 to 0.04)                               |
| HT + Ulcer, n=145              | -0.15 (-0.20 to -0.10)                         | 0.02 (-0.01 to 0.05)                           | 0.02 (-0.01 to 0.05)                               |
| Cancer, n=132                  | -0.03 (-0.08 to -0.03)                         | 0.01 (-0.03 to 0.04)                           | 0.01 (-0.03 to 0.04)                               |
| HT + Dep, n=111                | -0.18 (-0.26 to -0.12)                         | 0.01 (-0.02 to 0.05)                           | 0.01 (-0.02 to 0.05)                               |
| HT + Cancer, n=82              | -0.15 (-0.22 to -0.08)                         | -0.01 (-0.05 to 0.03)                          | -0.01 (-0.05 to 0.03)                              |
| HT + HD + DM, n=62             | -0.19 (-0.27 to -0.12)                         | -0.00 (-0.05 to 0.05)                          | -0.00 (-0.05 to 0.05)                              |
| Anemia, n=47                   | -0.02 (-0.07 to 0.11)                          | -0.05 (-0.10 to 0.01)                          | -0.05 (-0.10 to 0.01)                              |
| HT + Ren/Liv, n=46             | -0.06 (-0.15 to -0.03)                         | -0.02 (-0.08 to 0.04)                          | -0.02 (-0.08 to 0.04)                              |
|                                |                                                |                                                |                                                    |
| <b>Number of comorbidities</b> |                                                |                                                |                                                    |
| 1 comorbidity, n=6,016         | -0.09 (-0.10 to -0.8)                          | -0.00 (-0.01 to 0.01)                          | -0.00 (-0.01 to 0.01)                              |
| 2 comorbidities, n=2,285       | -0.17 (-0.18 to -0.15)                         | -0.01 (-0.02 to 0.00)                          | -0.01 (-0.02 to 0.00)                              |
| 3 comorbidities, n=680         | -0.21 (-0.24 to -0.19)                         | -0.00 (-0.02 to 0.01)                          | -0.00 (-0.02 to 0.01)                              |
| ≥4 comorbidities, n=208        | -0.29 (-0.33 to -0.25)                         | 0.01 (-0.02 to 0.03)                           | 0.01 (-0.02 to 0.04)                               |

n: Number, CI: Confidence interval. Comor: Comorbidities, HT: Hypertension, DM: Diabetes mellitus 1 and 2, Resp: Respiratory disease, HD: Heart disease, Neu: Neurologic disease, RA: Rheumatoid arthritis, Dep: Depression, Ren/Liv: Renal and/or liver disease. \*Adjusted for age, sex, BMI, educational level, not born in Denmark, civil status, physical activity, problems in other joints, use of analgesics, and number of bodily pain areas.

**Supplementary Table S7.** Sensitivity analyses using only individuals with complete data at all time points (complete-case analysis) for knee and hip pain (VAS) differences at baseline, and changes immediately after, and 12 months after exercise therapy and education between participants with and without comorbidities.

|                                | <b>Baseline VAS</b><br>Mean mm (95% CI) | <b>3 mo. VAS</b><br>Mean mm (95% CI)    | <b>Change 3 mo. VAS</b><br>Mean mmm (95% CI) | <b>12 mo. VAS</b><br>Mean mm (95% CI)    | <b>Change 12 mo. VAS</b><br>Mean mm (95% CI) |
|--------------------------------|-----------------------------------------|-----------------------------------------|----------------------------------------------|------------------------------------------|----------------------------------------------|
| No comor, n=6,954              | 44.8 (44.3 to 45.3)                     | 31.8 (31.3 to 32.3)                     | -13.0 (-13.6 to -12.5)                       | 31.3 (30.8 to 31.8)                      | -13.5 (-14.1 to -12.9)                       |
|                                |                                         |                                         |                                              |                                          |                                              |
|                                | <b>Difference at baseline</b>           | <b>Difference in change at 3 months</b> |                                              | <b>Difference in change at 12 months</b> |                                              |
|                                | Mean mm<br>(95% CI)                     | Unadjusted mean mm<br>(95% CI)          | Adjusted* mean mm<br>(95% CI)                | Unadjusted mean mm<br>(95% CI)           | Adjusted* mean mm<br>(95% CI)                |
| HT, n=3,219                    | 2.2 (1.3 to 3.1)                        | 0.0 (-1.0 to 1.0)                       | -0.0 (-1.0 to 1.0)                           | 0.6 (-0.4 to 1.7)                        | 0.6 (-0.4 to 1.7)                            |
| HT + DM, n=382                 | 3.6 (1.3 to 5.9)                        | 1.7 (-0.9 to 4.1)                       | 1.5 (-1.0 to 4.1)                            | 2.8 (0.3 to 5.3)                         | 2.9 (0.4 to 5.5)                             |
| HT + HD, n=331                 | 2.6 (0.1 to 5.0)                        | 0.1 (-2.6 to 2.8)                       | 0.1 (-2.6 to 2.7)                            | 1.3 (-1.4 to 4.0)                        | 1.3 (-1.4 to 4.0)                            |
| Resp, n=321                    | 3.0 (0.5 to 5.5)                        | -0.8 (-3.6 to 1.9)                      | -0.8 (-3.6 to 1.9)                           | 0.5 (-2.2 to 3.2)                        | 0.5 (-2.2 to 3.2)                            |
| HD, n=300                      | -0.7 (-3.3 to 1.8)                      | 4.3 (1.5 to 7.1)                        | 4.3 (1.5 to 7.1)                             | 4.2 (1.4 to 7.0)                         | 4.2 (1.4 to 7.0)                             |
| Neu, n=282                     | 4.2 (1.5 to 6.8)                        | -0.8 (-3.7 to 2.1)                      | -0.6 (-3.5 to 2.3)                           | -0.4 (-3.3 to 2.5)                       | -0.5 (-3.4 to 2.4)                           |
| RA, n=253                      | 2.3 (-0.5 to 5.1)                       | -1.3 (-4.3 to 1.8)                      | -1.3 (-4.3 to 1.8)                           | -1.6 (-4.6 to 1.5)                       | -1.6 (-4.6 to 1.5)                           |
| Ulcer, n=238                   | 4.5 (1.7 to 7.4)                        | -0.9 (-4.1 to 2.2)                      | -0.9 (-4.1 to 2.2)                           | -0.0 (-3.2 to 3.1)                       | -0.0 (-3.2 to 3.1)                           |
| Dep, n=174                     | 5.9 (2.6 to 9.3)                        | 0.1 (-3.5 to 3.8)                       | 0.1 (-3.5 to 3.8)                            | 2.4 (-1.2 to 6.1)                        | 2.4 (-1.2 to 6.1)                            |
| DM, n=184                      | 2.2 (-1.0 to 5.4)                       | 1.7 (-1.8 to 5.3)                       | 1.8 (-1.8 to 5.3)                            | 0.6 (-3.0 to 4.1)                        | 0.6 (-3.0 to 4.1)                            |
| HT + Resp, n=145               | 3.3 (-0.4 to 6.9)                       | 2.0 (-1.9 to 6.0)                       | 2.1 (-1.9 to 6.1)                            | -0.1 (-4.1 to 3.9)                       | -0.1 (-4.1 to 3.9)                           |
| HT + RA, n=142                 | 5.7 (2.0 to 9.4)                        | 0.9 (-3.2 to 4.9)                       | 0.8 (-3.2 to 4.9)                            | 0.9 (-3.1 to 5.0)                        | 0.9 (-3.1 to 5.0)                            |
| HT + Neu, n=139                | -0.6 (-4.3 to 3.1)                      | 7.0 (2.9 to 11.1)                       | 6.9 (2.8 to 11.0)                            | 8.5 (4.4 to 12.6)                        | 8.3 (4.2 to 12.4)                            |
| HT + Ulcer, n=141              | 6.4 (2.7 to 10.0)                       | 0.9 (-3.2 to 4.9)                       | 1.1 (-2.9 to 5.2)                            | 3.3 (-0.8 to 7.3)                        | 3.4 (-0.7 to 7.5)                            |
| Cancer, n=137                  | 3.2 (-0.6 to 6.9)                       | 2.7 (-1.4 to 6.8)                       | 2.7 (-1.4 to 6.8)                            | 1.9 (-2.2 to 6.0)                        | 1.9 (-2.2 to 6.1)                            |
| HT + Dep, n=78                 | 7.5 (2.5 to 12.4)                       | -2.7 (-8.2 to 2.7)                      | -2.7 (-8.1 to 2.7)                           | 0.6 (-4.8 to 6.0)                        | 0.6 (-4.8 to 6.1)                            |
| HT + Cancer, n=71              | 1.9 (-3.3 to 7.0)                       | 5.6 (-0.1 to 11.3)                      | 5.6 (-0.1 to 11.3)                           | -0.6 (-6.2 to 5.1)                       | -0.6 (-6.2 to 5.1)                           |
| HT + HD + DM, n=45             | 5.3 (-1.2 to 11.8)                      | -1.4 (-8.5 to 5.7)                      | -1.4 (-8.5 to 5.7)                           | -4.0 (-11.2 to 3.1)                      | -4.0 (-11.2 to 3.1)                          |
| Anemia, n=45                   | 1.6 (-4.8 to 8.1)                       | -3.5 (-10.6 to 3.7)                     | -3.4 (-10.6 to 3.7)                          | -3.7 (-10.8 to 3.4)                      | -3.7 (-10.8 to 3.4)                          |
| HT + Ren/Liv. n=42             | 3.2 (-3.5 to 10.)                       | 1.0 (-6.4 to 8.8)                       | 1.0 (-6.4 to 8.3)                            | 1.4 (-5.9 to 8.8)                        | 1.4 (-5.9 to 8.8)                            |
|                                |                                         |                                         |                                              |                                          |                                              |
| <b>Number of comorbidities</b> |                                         |                                         |                                              |                                          |                                              |
| 1 comorbidity, n=5,198         | 2.4 (1.6 to 3.2)                        | 0.2 (-0.7 to 1.0)                       | 0.2 (-0.7 to 1.0)                            | 0.7 (-0.2 to 1.5)                        | 0.7 (-0.2 to 1.5)                            |
| 2 comorbidities, n=1,885       | 3.7 (2.6 to 4.9)                        | 1.5 (0.3 to 2.8)                        | 1.5 (0.3 to 2.8)                             | 1.9 (0.7 to 3.2)                         | 1.9 (0.7 to 3.2)                             |
| 3 comorbidities, n=545         | 6.7 (4.8 to 8.7)                        | 0.5 (-1.7 to 2.6)                       | 0.5 (-1.6 to 2.6)                            | 1.1 (-1.0 to 3.3)                        | 1.2 (-0.9 to 3.3)                            |
| ≥4 comorbidities, n=166        | 9.0 (5.6 to 12.4)                       | 4.7 (0.9 to 8.4)                        | 4.9 (1.15 to 8.7)                            | 1.7 (-2.0 to 5.5)                        | 1.9 (-1.9 to 5.6)                            |

n: Number, CI: Confidence interval. Comor: Comorbidities, HT: Hypertension, DM: Diabetes mellitus 1 and 2, Resp: Respiratory disease, HD: Heart disease, Neu: Neurologic disease, RA: Rheumatoid arthritis, Dep: Depression, Ren/Liv: Renal and/or liver disease. \*Adjusted for age, sex, BMI, educational level, not born in Denmark, civil status, physical activity, problems in other joints, use of analgesics, and number of bodily pain areas.

**Supplementary Table S8.** Sensitivity analyses using only individuals with complete data at all time points (complete-case analysis) for quality of life (EQ-5D-5L) differences at baseline, and changes immediately after, and 12 months after exercise therapy and education between participants with and without comorbidities.

|                                | <b>Baseline EQ-5D-5L</b><br>Mean (95% CI) | <b>3 mo. EQ-5D-5L</b><br>Mean (95% CI)  | <b>Change 3 mo. EQ-5D-5L</b><br>Mean (95% CI) | <b>12 mo. EQ-5D-5L</b><br>Mean (95% CI)  | <b>Change 12 mo. EQ-5D-5L</b><br>Mean (95% CI) |
|--------------------------------|-------------------------------------------|-----------------------------------------|-----------------------------------------------|------------------------------------------|------------------------------------------------|
| No comor, n=6,958              | 0.730 (0.728 to 0.733)                    | 0.770 (0.768 to 0.773)                  | 0.040 (0.037 to 0.043)                        | 0.781 (0.778 to 0.784)                   | 0.050 (0.047 to 0.053)                         |
|                                |                                           |                                         |                                               |                                          |                                                |
|                                | <b>Difference at baseline</b>             | <b>Difference in change at 3 months</b> |                                               | <b>Difference in change at 12 months</b> |                                                |
|                                | Mean<br>(95% CI)                          | Unadjusted mean<br>(95% CI)             | Adjusted* mean<br>(95% CI)                    | Unadjusted mean<br>(95% CI)              | Adjusted* mean<br>(95% CI)                     |
| HT, n=3,222                    | -0.008 (-0.013 to -0.003)                 | -0.004 (-0.009 to 0.001)                | -0.004 (-0.009 to 0.001)                      | -0.007 (-0.012 to -0.002)                | -0.007 (-0.012 to -0.002)                      |
| HT + DM, n=382                 | -0.019 (-0.031 to -0.007)                 | -0.009 (-0.020 to 0.004)                | -0.007 (-0.020 to 0.005)                      | -0.019 (-0.032 to -0.007)                | -0.020 (-0.033 to -0.008)                      |
| HT + HD, n=331                 | -0.022 (-0.034 to -0.009)                 | 0.001 (-0.013 to 0.014)                 | 0.001 (-0.013 to 0.014)                       | -0.020 (-0.033 to -0.007)                | -0.020 (-0.033 to -0.007)                      |
| Resp, n=321                    | -0.018 (-0.032 to -0.005)                 | 0.003 (-0.010 to 0.017)                 | 0.003 (-0.010 to 0.017)                       | -0.005 (-0.018 to 0.009)                 | -0.005 (-0.018 to 0.009)                       |
| HD, n=299                      | -0.004 (-0.018 to 0.009)                  | -0.016 (-0.030 to -0.002)               | -0.016 (-0.030 to -0.002)                     | -0.015 (-0.029 to -0.001)                | -0.015 (-0.029 to -0.001)                      |
| Neu, n=282                     | -0.025 (-0.039 to -0.011)                 | 0.002 (-0.013 to 0.016)                 | 0.001 (-0.013 to 0.016)                       | -0.002 (-0.017 to 0.012)                 | -0.002 (-0.017 to 0.012)                       |
| RA, n=252                      | -0.024 (-0.038 to -0.009)                 | 0.007 (-0.008 to 0.022)                 | 0.007 (-0.008 to 0.022)                       | -0.001 (-0.016 to 0.014)                 | -0.001 (-0.016 to 0.014)                       |
| Ulcer, n=239                   | -0.027 (-0.042 to -0.012)                 | 0.004 (-0.011 to 0.020)                 | 0.004 (-0.011 to 0.020)                       | -0.008 (-0.023 to 0.008)                 | -0.008 (-0.023 to 0.008)                       |
| Dep, n=175                     | -0.097 (-0.114 to -0.079)                 | 0.012 (-0.007 to 0.030)                 | 0.012 (-0.007 to 0.030)                       | -0.004 (-0.022 to 0.014)                 | -0.004 (-0.022 to 0.015)                       |
| DM, n=184                      | -0.014 (-0.031 to 0.004)                  | -0.010 (-0.028 to 0.008)                | -0.010 (-0.028 to 0.008)                      | 0.004 (-0.014 to 0.022)                  | 0.004 (-0.014 to 0.022)                        |
| HT + Resp, n=145               | -0.024 (-0.043 to -0.005)                 | -0.007 (-0.027 to 0.013)                | -0.007 (-0.027 to 0.013)                      | 0.002 (-0.018 to 0.022)                  | 0.002 (-0.018 to 0.022)                        |
| HT + RA, n=142                 | -0.031 (-0.051 to -0.012)                 | -0.001 (-0.021 to 0.019)                | -0.000 (-0.020 to 0.020)                      | -0.004 (-0.024 to 0.016)                 | -0.005 (-0.025 to 0.015)                       |
| HT + Neu, n=139                | -0.010 (-0.029 to 0.010)                  | -0.013 (-0.033 to 0.008)                | -0.012 (-0.033 to 0.007)                      | -0.027 (-0.047 to -0.006)                | -0.027 (-0.047 to -0.007)                      |
| HT + Ulcer, n=141              | -0.030 (-0.050 to -0.012)                 | -0.002 (-0.022 to 0.018)                | -0.002 (-0.022 to 0.018)                      | -0.012 (-0.032 to 0.008)                 | -0.012 (-0.032 to 0.008)                       |
| Cancer, n=137                  | -0.025 (-0.045 to -0.005)                 | -0.013 (-0.033 to 0.007)                | -0.013 (-0.033 to 0.007)                      | -0.014 (-0.034 to 0.006)                 | -0.014 (-0.034 to 0.006)                       |
| HT + Dep, n=79                 | -0.103 (-0.129 to -0.077)                 | 0.016 (-0.010 to 0.043)                 | 0.016 (-0.010 to 0.043)                       | 0.032 (0.005 to 0.058)                   | 0.032 (0.005 to 0.058)                         |
| HT + Cancer, n=71              | -0.007 (-0.034 to 0.021)                  | -0.028 (-0.056 to 0.000)                | -0.028 (-0.056 to 0.000)                      | -0.004 (-0.033 to 0.024)                 | -0.004 (-0.033 to 0.024)                       |
| HT + HD + DM, n=47             | -0.043 (-0.077 to -0.009)                 | 0.002 (-0.032 to 0.036)                 | 0.002 (-0.032 to 0.036)                       | 0.040 (0.006 to 0.074)                   | 0.040 (0.006 to 0.074)                         |
| Anemia, n=45                   | 0.006 (-0.028 to 0.040)                   | 0.001 (-0.034 to 0.037)                 | 0.001 (-0.034 to 0.037)                       | 0.011 (-0.024 to 0.046)                  | 0.011 (-0.024 to 0.046)                        |
| HT + Ren/Liv. n=41             | -0.033 (-0.070 to 0.003)                  | 0.005 (-0.032 to 0.042)                 | 0.005 (-0.032 to 0.042)                       | 0.014 (-0.022 to 0.051)                  | 0.014 (-0.022 to 0.051)                        |
|                                |                                           |                                         |                                               |                                          |                                                |
| <b>Number of comorbidities</b> |                                           |                                         |                                               |                                          |                                                |
| 1 comorbidity, n=5,201         | -0.014 (-0.019 to -0.010)                 | -0.003 (-0.007 to 0.001)                | -0.003 (-0.007 to 0.001)                      | -0.006 (-0.011 to -0.002)                | -0.006 (-0.010 to -0.002)                      |
| 2 comorbidities, n=1,887       | -0.030 (-0.036 to -0.023)                 | -0.005 (-0.011 to 0.001)                | -0.005 (-0.011 to 0.001)                      | -0.012 (-0.018 to -0.005)                | -0.012 (-0.018 to -0.006)                      |
| 3 comorbidities, n=549         | -0.050 (-0.061 to -0.040)                 | -0.005 (-0.016 to 0.005)                | -0.005 (-0.016 to 0.005)                      | -0.013 (-0.023 to -0.002)                | -0.013 (-0.024 to -0.002)                      |
| ≥4 comorbidities, n=166        | -0.096 (-0.115 to -0.078)                 | -0.007 (-0.025 to 0.015)                | -0.004 (-0.023 to 0.014)                      | -0.007 (-0.025 to 0.012)                 | -0.007 (-0.025 to 0.012)                       |

n: Number, CI: Confidence interval. Comor: Comorbidities, HT: Hypertension, DM: Diabetes mellitus 1 and 2, Resp: Respiratory disease, HD: Heart disease, Neu: Neurologic disease, RA: Rheumatoid arthritis, Dep: Depression, Ren/Liv: Renal and/or liver disease. \*Adjusted for age, sex, BMI, educational level, not born in Denmark, civil status, physical activity, problems in other joints, use of analgesics, and number of bodily pain areas.

| <b>Supplementary Table S9.</b> Sensitivity analyses with stratification for most affected joint in the adjusted analysis for difference in change in 40-meter Fast-Paced Walk Test (40-m FPWT) from baseline to immediately after exercise therapy and education in between participants with and without comorbidities. |                                                   |                                                   |
|--------------------------------------------------------------------------------------------------------------------------------------------------------------------------------------------------------------------------------------------------------------------------------------------------------------------------|---------------------------------------------------|---------------------------------------------------|
|                                                                                                                                                                                                                                                                                                                          | <b>Knee (n=18,271)</b>                            | <b>Hip (n=6,242)</b>                              |
|                                                                                                                                                                                                                                                                                                                          | <b>Change 3 mo. 40-m FPWT</b>                     | <b>Change 3 mo. 40-m FPWT</b>                     |
|                                                                                                                                                                                                                                                                                                                          | Mean m/s (95% CI)                                 | Mean m/s (95% CI)                                 |
| No comor, n=12,128                                                                                                                                                                                                                                                                                                       | 0.13 (0.12 to 0.13)                               | 0.11 (0.10 to 0.12)                               |
|                                                                                                                                                                                                                                                                                                                          |                                                   |                                                   |
|                                                                                                                                                                                                                                                                                                                          | <b>Adjusted* difference in change at 3 months</b> | <b>Adjusted* difference in change at 3 months</b> |
|                                                                                                                                                                                                                                                                                                                          | Mean m/s (95% CI)                                 | Mean m/s (95% CI)                                 |
| HT, n=5,716                                                                                                                                                                                                                                                                                                              | -0.00 (-0.01 to 0.01)                             | -0.01 (-0.02 to 0.01)                             |
| HT + DM, n=729                                                                                                                                                                                                                                                                                                           | 0.00 (-0.02 to 0.02)                              | 0.00 (-0.04 to 0.04)                              |
| HT + HD, n=630                                                                                                                                                                                                                                                                                                           | -0.01 (-0.03 to 0.01)                             | -0.02 (-0.06 to 0.01)                             |
| Resp, n=558                                                                                                                                                                                                                                                                                                              | -0.00 (-0.03 to 0.02)                             | -0.02 (-0.06 to 0.01)                             |
| HD, n=551                                                                                                                                                                                                                                                                                                                | -0.02 (-0.04 to 0.00)                             | 0.00 (-0.04 to 0.04)                              |
| Neu, n=508                                                                                                                                                                                                                                                                                                               | 0.01 (-0.02 to 0.03)                              | -0.00 (-0.04 to 0.04)                             |
| RA, n=501                                                                                                                                                                                                                                                                                                                | 0.02 (-0.01 to 0.04)                              | 0.02 (-0.02 to 0.07)                              |
| Ulcer, n=447                                                                                                                                                                                                                                                                                                             | -0.01 (-0.04 to 0.01)                             | -0.00 (-0.05 to 0.04)                             |
| Dep, n=408                                                                                                                                                                                                                                                                                                               | 0.01 (-0.02 to 0.04)                              | 0.01 (-0.04 to 0.06)                              |
| DM, n=358                                                                                                                                                                                                                                                                                                                | -0.01 (-0.04 to 0.01)                             | -0.03 (-0.08 to 0.03)                             |
| HT + Resp, n=323                                                                                                                                                                                                                                                                                                         | -0.03 (-0.06 to 0.00)                             | -0.03 (-0.08 to 0.02)                             |
| HT + RA, n=275                                                                                                                                                                                                                                                                                                           | -0.03 (-0.07 to 0.01)                             | -0.03 (-0.09 to 0.03)                             |
| HT + Neu, n=274                                                                                                                                                                                                                                                                                                          | 0.01 (-0.03 to 0.04)                              | 0.01 (-0.04 to 0.07)                              |
| HT + Ulcer, n=254                                                                                                                                                                                                                                                                                                        | 0.02 (-0.01 to 0.05)                              | 0.02 (-0.04 to 0.07)                              |
| Cancer, n=234                                                                                                                                                                                                                                                                                                            | 0.01 (-0.03 to 0.04)                              | 0.03 (-0.03 to 0.09)                              |
| HT + Dep, n=203                                                                                                                                                                                                                                                                                                          | 0.02 (-0.02 to 0.05)                              | -0.00 (-0.07 to 0.07)                             |
| HT + Cancer, n=137                                                                                                                                                                                                                                                                                                       | -0.01 (-0.06 to 0.04)                             | 0.01 (-0.07 to 0.08)                              |
| HT + HD + DM, n=117                                                                                                                                                                                                                                                                                                      | 0.00 (-0.05 to 0.06)                              | 0.03 (-0.06 to 0.12)                              |
| Anemia, n=83                                                                                                                                                                                                                                                                                                             | -0.07 (-0.12 to -0.01)                            | -0.04 (-0.15 to 0.08)                             |
| HT + Ren/Liv, n=79                                                                                                                                                                                                                                                                                                       | -0.02 (-0.09 to 0.04)                             | -0.06 (-0.15 to 0.04)                             |
|                                                                                                                                                                                                                                                                                                                          |                                                   |                                                   |
| <b>Number of comorbidities</b>                                                                                                                                                                                                                                                                                           |                                                   |                                                   |
| 1 comorbidity, n=9,441                                                                                                                                                                                                                                                                                                   | -0.00 (-0.01 to 0.01)                             | -0.00 (-0.01 to 0.01)                             |
| 2 comorbidities, n=3,838                                                                                                                                                                                                                                                                                                 | -0.00 (-0.01 to 0.01)                             | -0.01 (-0.03 to 0.01)                             |
| 3 comorbidities, n=1,173                                                                                                                                                                                                                                                                                                 | -0.00 (-0.02 to 0.01)                             | 0.00 (-0.03 to 0.03)                              |
| ≥4 comorbidities, n=392                                                                                                                                                                                                                                                                                                  | 0.00 (-0.03 to 0.03)                              | 0.02 (-0.03 to 0.07)                              |

n: Number, CI: Confidence interval. Comor: Comorbidities, HT: Hypertension, DM: Diabetes mellitus 1 and 2, Resp: Respiratory disease, HD: Heart disease, Neu: Neurologic disease, RA: Rheumatoid arthritis, Dep: Depression, Ren/Liv: Renal and/or liver disease. \*Adjusted for age, sex, BMI, educational level, not born in Denmark, civil status.

**Supplementary Table S10.** Sensitivity analyses with stratification for most affected joint in the adjusted analysis for differences in change in knee and hip pain (VAS) from baseline to immediately after, and 12 months after exercise therapy and education between participants with and without comorbidities.

|                                                                                                                                                                                                                                                                                                                                                         | Knee (n=18,271)                                                            |                                                                            | Hip (n=6,242)                                                              |                                                                            |
|---------------------------------------------------------------------------------------------------------------------------------------------------------------------------------------------------------------------------------------------------------------------------------------------------------------------------------------------------------|----------------------------------------------------------------------------|----------------------------------------------------------------------------|----------------------------------------------------------------------------|----------------------------------------------------------------------------|
|                                                                                                                                                                                                                                                                                                                                                         | Change 3 mo. VAS<br>Mean mmm (95% CI)                                      | Change 12 mo. VAS<br>Mean mm (95% CI)                                      | Change 3 mo. VAS<br>Mean mmm (95% CI)                                      | Change 12 mo. VAS<br>Mean mm (95% CI)                                      |
| No comor, n=12,128                                                                                                                                                                                                                                                                                                                                      | -13.3 (-13.9 to -12.7)                                                     | -14.0 (-14.6 to -13.4)                                                     | -11.0 (-12.0 to -10.1)                                                     | -13.4 (-14.5 to -12.3)                                                     |
|                                                                                                                                                                                                                                                                                                                                                         |                                                                            |                                                                            |                                                                            |                                                                            |
|                                                                                                                                                                                                                                                                                                                                                         | <b>Adjusted * difference in<br/>change at 3 months</b><br>mean mm (95% CI) | <b>Adjusted* difference in<br/>change at 12 months</b><br>mean mm (95% CI) | <b>Adjusted * difference in<br/>change at 3 months</b><br>mean mm (95% CI) | <b>Adjusted* difference in<br/>change at 12 months</b><br>mean mm (95% CI) |
| HT, n=5,716                                                                                                                                                                                                                                                                                                                                             | 0.5 (-0.5 to 1.5)                                                          | 1.5 (0.5 to 2.5)                                                           | -0.2 (-2.0 to 1.5)                                                         | 0.5 (-1.4 to 2.4)                                                          |
| HT + DM, n=729                                                                                                                                                                                                                                                                                                                                          | 1.3 (-1.0 to 3.6)                                                          | 2.3 (-0.2 to 4.7)                                                          | 2.3 (-2.1 to 6.6)                                                          | 3.9 (-0.5 to 8.3)                                                          |
| HT + HD, n=630                                                                                                                                                                                                                                                                                                                                          | -0.4 (-2.8 to 2.0)                                                         | 0.5 (-2.1 to 3.2)                                                          | 1.3 (-3.1 to 5.6)                                                          | 3.2 (-1.5 to 7.9)                                                          |
| Resp, n=558                                                                                                                                                                                                                                                                                                                                             | -0.2 (-2.7 to 2.6)                                                         | 1.3 (-1.7 to 4.3)                                                          | 0.7 (-3.7 to 5.0)                                                          | 2.2 (-2.5 to 6.9)                                                          |
| HD, n=551                                                                                                                                                                                                                                                                                                                                               | 3.8 (1.2 to 6.4)                                                           | 4.9 (2.0 to 7.8)                                                           | 2.9 (-1.7 to 7.6)                                                          | 1.9 (-3.5 to 6.3)                                                          |
| Neu, n=508                                                                                                                                                                                                                                                                                                                                              | -1.4 (-4.1 to 1.3)                                                         | -0.3 (-3.4 to 2.8)                                                         | -1.1 (-5.9 to 3.6)                                                         | -1.3 (-6.3 to 3.6)                                                         |
| RA, n=501                                                                                                                                                                                                                                                                                                                                               | -1.2 (-4.2 to 1.7)                                                         | -0.2 (-3.3 to 3.0)                                                         | -1.0 (-5.8 to 3.8)                                                         | -2.0 (-6.9 to 2.9)                                                         |
| Ulcer, n=447                                                                                                                                                                                                                                                                                                                                            | -0.7 (-3.6 to 2.3)                                                         | -1.1 (-4.4 to 2.1)                                                         | -2.2 (-7.5 to 3.1)                                                         | 2.6 (-3.1 to 8.3)                                                          |
| Dep, n=408                                                                                                                                                                                                                                                                                                                                              | -0.6 (-3.7 to 2.5)                                                         | 2.3 (-1.6 to 6.2)                                                          | 3.3 (-2.5 to 9.0)                                                          | 4.1 (-2.1 to 10.2)                                                         |
| DM, n=358                                                                                                                                                                                                                                                                                                                                               | 0.1 (-3.1 to 3.3)                                                          | -1.4 (-5.0 to 2.2)                                                         | 2.0 (-4.4 to 8.3)                                                          | 3.0 (-4.1 to 10.0)                                                         |
| HT + Resp, n=323                                                                                                                                                                                                                                                                                                                                        | 3.4 (-0.0 to 6.7)                                                          | 1.4 (-2.4 to 5.2)                                                          | 2.0 (-4.1 to 8.1)                                                          | -2.5 (-9.3 to 4.4)                                                         |
| HT + RA, n=275                                                                                                                                                                                                                                                                                                                                          | 2.7 (-1.0 to 6.3)                                                          | 2.4 (-1.8 to 6.5)                                                          | -0.4 (-7.0 to 6.2)                                                         | 2.5 (-4.7 to 9.8)                                                          |
| HT + Neu, n=274                                                                                                                                                                                                                                                                                                                                         | 5.7 (2.1 to 9.3)                                                           | 7.8 (3.9 to 11.7)                                                          | 3.2 (-3.7 to 10.1)                                                         | 5.1 (-2.3 to 12.5)                                                         |
| HT + Ulcer, n=254                                                                                                                                                                                                                                                                                                                                       | -0.3 (-4.3 to 3.6)                                                         | 3.5 (-0.7 to 7.6)                                                          | -0.1 (-6.7 to 6.5)                                                         | 1.4 (-6.3 to 9.0)                                                          |
| Cancer, n=234                                                                                                                                                                                                                                                                                                                                           | 1.7 (-2.4 to 5.8)                                                          | 2.7 (-1.6 to 7.0)                                                          | 5.0 (-2.0 to 11.9)                                                         | 3.7 (-3.7 to 11.0)                                                         |
| HT + Dep, n=203                                                                                                                                                                                                                                                                                                                                         | -0.8 (-5.1 to 3.5)                                                         | 1.9 (-3.2 to 7.1)                                                          | -2.7 (-11.7 to 6.4)                                                        | 3.9 (-5.2 to 13.0)                                                         |
| HT + Cancer, n=137                                                                                                                                                                                                                                                                                                                                      | 6.0 (0.7 to 11.3)                                                          | 2.3 (-3.3 to 8.0)                                                          | 3.8 (-5.2 to 12.9)                                                         | -5.7 (-15.2 to 3.9)                                                        |
| HT + HD + DM, n=117                                                                                                                                                                                                                                                                                                                                     | -3.7 (-10.0 to 2.6)                                                        | -3.5 (-11.0 to 4.1)                                                        | 8.8 (-1.9 to 19.4)                                                         | 4.0 (-8.3 to 16.2)                                                         |
| Anemia, n=83                                                                                                                                                                                                                                                                                                                                            | -0.8 (-7.3 to 5.6)                                                         | -2.5 (-9.5 to 4.4)                                                         | -1.9 (-14.9 to 11.1)                                                       | -3.4 (-17.4 to 10.6)                                                       |
| HT + Ren/Liv. n=79                                                                                                                                                                                                                                                                                                                                      | -0.5 (-7.6 to 6.6)                                                         | 3.1 (-4.3 to 10.5)                                                         | 0.6 (-11.4 to 12.5)                                                        | 2.9 (-9.5 to 15.4)                                                         |
|                                                                                                                                                                                                                                                                                                                                                         |                                                                            |                                                                            |                                                                            |                                                                            |
| <b>Number of<br/>comorbidities</b>                                                                                                                                                                                                                                                                                                                      |                                                                            |                                                                            |                                                                            |                                                                            |
| 1 comorbidity, n=9,441                                                                                                                                                                                                                                                                                                                                  | 0.3 (-0.5 to 1.2)                                                          | 1.3 (0.4 to 2.1)                                                           | 0.1 (-1.4 to 1.5)                                                          | 0.7 (-0.8 to 2.3)                                                          |
| 2 comorbidities, n=3,838                                                                                                                                                                                                                                                                                                                                | 1.5 (0.5 to 2.6)                                                           | 2.0 (0.8 to 3.1)                                                           | 1.1 (-1.0 to 3.2)                                                          | 1.9 (-0.2 to 4.0)                                                          |
| 3 comorbidities, n=1,173                                                                                                                                                                                                                                                                                                                                | 0.7 (-1.2 to 2.6)                                                          | 1.2 (-0.8 to 3.3)                                                          | 0.1 (-3.2 to 3.3)                                                          | 1.4 (-2.2 to 5.0)                                                          |
| ≥4 comorbidities, n=392                                                                                                                                                                                                                                                                                                                                 | 3.1 (-0.1 to 6.3)                                                          | 0.7 (-3.1 to 4.4)                                                          | 1.6 (-4.4 to 7.5)                                                          | -0.7 (-7.3 to 6.0)                                                         |
| n: Number, CI: Confidence interval. Comor: Comorbidities, HT: Hypertension, DM: Diabetes mellitus 1 and 2, Resp: Respiratory disease, HD: Heart disease, Neu: Neurologic disease, RA: Rheumatoid arthritis, Dep: Depression, Ren/Liv: Renal and/or liver disease.<br>*Adjusted for age, sex, BMI, educational level, not born in Denmark, civil status. |                                                                            |                                                                            |                                                                            |                                                                            |

**Supplementary Table S11.** Sensitivity analyses with stratification for most affected joint in the adjusted analysis for differences in change in quality of life (EQ-5D-5L) from baseline to immediately after, and 12 months after exercise therapy and education between participants with and without comorbidities.

|                                                                                                                                                                                                                                                                                                                                                         | Knee (n=18,271)                                                         |                                                                         | Hip (n=6,242)                                                           |                                                                         |
|---------------------------------------------------------------------------------------------------------------------------------------------------------------------------------------------------------------------------------------------------------------------------------------------------------------------------------------------------------|-------------------------------------------------------------------------|-------------------------------------------------------------------------|-------------------------------------------------------------------------|-------------------------------------------------------------------------|
|                                                                                                                                                                                                                                                                                                                                                         | Change 3 mo. EQ-5D-5L<br>Mean (95% CI)                                  | Change 12 mo. EQ-5D-5L<br>Mean (95% CI)                                 | Change 3 mo. EQ-5D-5L<br>Mean (95% CI)                                  | Change 12 mo. EQ-5D-5L<br>Mean (95% CI)                                 |
| No comor, n=12,128                                                                                                                                                                                                                                                                                                                                      | 0.042 (0.039 to 0.045)                                                  | 0.052 (0.049 to 0.055)                                                  | 0.30 (0.25 to 0.35)                                                     | 0.47 (0.41 to 0.052)                                                    |
|                                                                                                                                                                                                                                                                                                                                                         |                                                                         |                                                                         |                                                                         |                                                                         |
|                                                                                                                                                                                                                                                                                                                                                         | <b>Adjusted * difference in<br/>change at 3 months</b><br>mean (95% CI) | <b>Adjusted* difference in<br/>change at 12 months</b><br>mean (95% CI) | <b>Adjusted * difference in<br/>change at 3 months</b><br>mean (95% CI) | <b>Adjusted* difference in<br/>change at 12 months</b><br>mean (95% CI) |
| HT, n=5,716                                                                                                                                                                                                                                                                                                                                             | -0.005 (-0.010 to 0.000)                                                | -0.009 (-0.014 to -0.004)                                               | -0.002 (-0.011 to 0.007)                                                | -0.004 (-0.014 to -0.006)                                               |
| HT + DM, n=729                                                                                                                                                                                                                                                                                                                                          | -0.007 (-0.018 to 0.005)                                                | -0.016 (-0.028 to 0.003)                                                | -0.008 (-0.031 to 0.015)                                                | -0.031 (-0.057 to 0.005)                                                |
| HT + HD, n=630                                                                                                                                                                                                                                                                                                                                          | 0.005 (-0.008 to 0.018)                                                 | -0.021 (-0.036 to -0.006)                                               | -0.015 (-0.037 to 0.007)                                                | -0.029 (-0.056 to -0.003)                                               |
| Resp, n=558                                                                                                                                                                                                                                                                                                                                             | 0.004 (-0.009 to 0.017)                                                 | -0.007 (-0.022 to 0.009)                                                | -0.008 (-0.030 to 0.015)                                                | -0.013 (-0.037 to 0.012)                                                |
| HD, n=551                                                                                                                                                                                                                                                                                                                                               | -0.018 (-0.031 to -0.005)                                               | -0.019 (-0.033 to -0.004)                                               | -0.014 (-0.025 to 0.022)                                                | -0.006 (-0.025 to 0.022)                                                |
| Neu, n=508                                                                                                                                                                                                                                                                                                                                              | 0.002 (-0.013 to 0.017)                                                 | -0.001 (-0.016 to 0.015)                                                | 0.000 (-0.024 to 0.025)                                                 | -0.001 (-0.027 to 0.025)                                                |
| RA, n=501                                                                                                                                                                                                                                                                                                                                               | 0.005 (-0.010 to 0.019)                                                 | -0.003 (-0.019 to 0.013)                                                | 0.024 (-0.001 to 0.050)                                                 | 0.004 (-0.022 to 0.031)                                                 |
| Ulcer, n=447                                                                                                                                                                                                                                                                                                                                            | 0.004 (-0.012 to 0.020)                                                 | -0.009 (-0.027 to 0.010)                                                | 0.004 (-0.025 to 0.033)                                                 | -0.016 (-0.046 to 0.013)                                                |
| Dep, n=408                                                                                                                                                                                                                                                                                                                                              | 0.017 (0.001 to 0.034)                                                  | 0.002 (-0.017 to 0.020)                                                 | 0.005 (-0.025 to 0.035)                                                 | -0.005 (-0.025 to 0.035)                                                |
| DM, n=358                                                                                                                                                                                                                                                                                                                                               | 0.000 (-0.016 to 0.016)                                                 | 0.013 (-0.005 to 0.032)                                                 | -0.017 (-0.051 to 0.016)                                                | -0.005 (-0.042 to 0.033)                                                |
| HT + Resp, n=323                                                                                                                                                                                                                                                                                                                                        | -0.003 (-0.020 to 0.014)                                                | -0.003 (-0.022 to 0.017)                                                | -0.018 (-0.050 to 0.013)                                                | 0.000 (-0.037 to 0.037)                                                 |
| HT + RA, n=275                                                                                                                                                                                                                                                                                                                                          | -0.007 (-0.025 to 0.011)                                                | -0.016 (-0.036 to 0.005)                                                | 0.012 (-0.026 to 0.049)                                                 | 0.014 (-0.027 to 0.056)                                                 |
| HT + Neu, n=274                                                                                                                                                                                                                                                                                                                                         | -0.015 (-0.034 to 0.004)                                                | -0.036 (-0.056 to -0.015)                                               | -0.003 (-0.040 to 0.033)                                                | -0.020 (-0.062 to -0.022)                                               |
| HT + Ulcer, n=254                                                                                                                                                                                                                                                                                                                                       | -0.004 (-0.023 to 0.015)                                                | -0.016 (-0.039 to 0.006)                                                | 0.048 (-0.031 to 0.041)                                                 | -0.009 (-0.051 to 0.034)                                                |
| Cancer, n=234                                                                                                                                                                                                                                                                                                                                           | -0.011 (-0.032 to 0.010)                                                | -0.018 (-0.039 to 0.003)                                                | 0.001 (-0.036 to 0.038)                                                 | -0.005 (-0.043 to 0.033)                                                |
| HT + Dep, n=203                                                                                                                                                                                                                                                                                                                                         | 0.008 (-0.016 to 0.032)                                                 | 0.020 (-0.010 to 0.051)                                                 | 0.032 (-0.021 to 0.084)                                                 | 0.034 (-0.018 to 0.087)                                                 |
| HT + Cancer, n=137                                                                                                                                                                                                                                                                                                                                      | -0.016 (-0.042 to 0.009)                                                | -0.006 (-0.035 to 0.023)                                                | -0.042 (-0.091 to 0.007)                                                | 0.007 (-0.044 to 0.058)                                                 |
| HT + HD + DM, n=117                                                                                                                                                                                                                                                                                                                                     | -0.008 (-0.039 to 0.024)                                                | -0.026 (-0.010 to 0.063)                                                | -0.021 (-0.073 to 0.031)                                                | 0.010 (-0.053 to 0.072)                                                 |
| Anemia, n=83                                                                                                                                                                                                                                                                                                                                            | -0.000 (-0.033 to 0.032)                                                | 0.019 (-0.017 to 0.055)                                                 | -0.009 (-0.079 to 0.060)                                                | -0.021 (-0.101 to 0.058)                                                |
| HT + Ren/Liv, n=79                                                                                                                                                                                                                                                                                                                                      | 0.006 (-0.032 to 0.043)                                                 | 0.009 (-0.030 to 0.049)                                                 | -0.008 (-0.070 to 0.055)                                                | -0.029 (-0.096 to 0.039)                                                |
|                                                                                                                                                                                                                                                                                                                                                         |                                                                         |                                                                         |                                                                         |                                                                         |
| <b>Number of<br/>comorbidities</b>                                                                                                                                                                                                                                                                                                                      |                                                                         |                                                                         |                                                                         |                                                                         |
| 1 comorbidity, n=9,441                                                                                                                                                                                                                                                                                                                                  | -0.002 (-0.007 to 0.002)                                                | -0.007 (-0.012 to -0.002)                                               | -0.000 (-0.008 to 0.007)                                                | -0.004 (-0.012 to 0.004)                                                |
| 2 comorbidities, n=3,838                                                                                                                                                                                                                                                                                                                                | -0.002 (-0.008 to 0.003)                                                | -0.012 (-0.019 to -0.005)                                               | -0.002 (-0.013 to 0.009)                                                | -0.011 (-0.022 to 0.000)                                                |
| 3 comorbidities, n=1,173                                                                                                                                                                                                                                                                                                                                | -0.011 (-0.021 to -0.001)                                               | -0.017 (-0.029 to -0.005)                                               | 0.009 (-0.009 to 0.026)                                                 | -0.004 (-0.024 to 0.017)                                                |
| ≥4 comorbidities, n=392                                                                                                                                                                                                                                                                                                                                 | 0.005 (-0.013 to 0.024)                                                 | -0.004 (-0.026 to 0.019)                                                | 0.004 (-0.031 to 0.038)                                                 | -0.004 (-0.038 to 0.030)                                                |
| n: Number, CI: Confidence interval. Comor: Comorbidities, HT: Hypertension, DM: Diabetes mellitus 1 and 2, Resp: Respiratory disease, HD: Heart disease, Neu: Neurologic disease, RA: Rheumatoid arthritis, Dep: Depression, Ren/Liv: Renal and/or liver disease.<br>*Adjusted for age, sex, BMI, educational level, not born in Denmark, civil status. |                                                                         |                                                                         |                                                                         |                                                                         |



**Supplementary Table S12.** Sensitivity analyses using only individuals with complete data at all time points (complete-case analysis) for estimating relative risks (RR) for not adhering to ten or more exercise sessions during an exercise therapy and education program for individuals with comorbidities compared to individuals without comorbidities.

|                                | <b>Attending &lt;10 exercise sessions, n (%)</b> | <b>Unadjusted RR (95% CI)</b> | <b>Adjusted* RR (95% CI)</b> |
|--------------------------------|--------------------------------------------------|-------------------------------|------------------------------|
| No comor, n=8,157              | 1,425 (17)                                       | 1 (reference)                 | 1 (reference)                |
| HT, n=3,917                    | 616 (16)                                         | 0.90 (0.83 to 0.98)           | 1.00 (0.92 to 1.09)          |
| HT + DM, n=498                 | 60 (12)                                          | 0.69 (0.54 to 0.88)           | 0.77 (0.60 to 0.98)          |
| HT + HD, n=415                 | 62 (15)                                          | 0.86 (0.68 to 1.08)           | 1.01 (0.80 to 1.28)          |
| Resp, n=375                    | 64 (17)                                          | 0.98 (0.78 to 1.23)           | 1.05 (0.84 to 1.32)          |
| HD, n=363                      | 52 (14)                                          | 0.82 (0.63 to 1.06)           | 0.95 (0.74 to 1.22)          |
| Neu, n=333                     | 59 (18)                                          | 1.01 (0.80 to 1.28)           | 1.03 (0.81 to 1.30)          |
| RA, n=305                      | 56 (18)                                          | 1.05 (0.83 to 1.34)           | 1.07 (0.84 to 1.36)          |
| Ulcer, n=276                   | 50 (18)                                          | 1.04 (0.80 to 1.34)           | 1.03 (0.80 to 1.34)          |
| Dep, n=231                     | 50 (22)                                          | 1.24 (0.97 to 1.59)           | 1.13 (0.87 to 1.46)          |
| DM, n=218                      | 48 (22)                                          | 1.26 (0.98 to 1.63)           | 1.34 (1.04 to 1.73)          |
| HT + Resp, n=202               | 35 (17)                                          | 0.99 (0.73 to 1.35)           | 1.18 (0.88 to 1.59)          |
| HT + RA, n=171                 | 32 (19)                                          | 1.07 (0.78 to 1.47)           | 1.18 (0.86 to 1.62)          |
| HT + Neu, n=163                | 30 (18)                                          | 1.05 (0.76 to 1.46)           | 1.20 (0.87 to 1.65)          |
| HT + Ulcer, n=151              | 18 (12)                                          | 0.68 (0.44 to 1.06)           | 0.82 (0.53 to 1.25)          |
| Cancer, n=140                  | 21 (15)                                          | 0.86 (0.58 to 1.28)           | 0.95 (0.64 to 1.40)          |
| HT + Dep, n=110                | 25 (23)                                          | 1.30 (0.92 to 1.84)           | 1.35 (0.95 to 1.90)          |
| HT + Cancer, n=84              | 6 (7)                                            | 0.41 (0.19 to 0.89)           | 0.50 (0.23 to 1.06)          |
| HT + HD + DM, n=62             | 11 (18)                                          | 1.02 (0.59 to 1.74)           | 1.25 (0.74 to 2.08)          |
| Anemia, n=50                   | 9 (18)                                           | 1.03 (0.57 to 1.87)           | 1.08 (0.60 to 1.94)          |
| HT + Ren/Liv, n=45             | 5 (11)                                           | 0.64 (0.28 to 1.46)           | 0.68 (0.30 to 1.54)          |
|                                |                                                  |                               |                              |
| <b>Number of comorbidities</b> |                                                  |                               |                              |
| 1 comorbidity, n=6,266         | 1,035 (17)                                       | 0.95 (0.88 to 1.02)           | 1.02 (0.95 to 1.10)          |
| 2 comorbidities, n=2,373       | 383 (16)                                         | 0.92 (0.83 to 1.02)           | 1.03 (0.93 to 1.15)          |
| 3 comorbidities, n=701         | 101 (14)                                         | 0.82 (0.68 to 0.99)           | 0.93 (0.77 to 1.12)          |
| ≥4 comorbidities, n=226        | 53 (23)                                          | 1.34 (1.06 to 1.71)           | 1.48 (1.17 to 1.88)          |

n: Number, CI: Confidence interval. Comor: Comorbidities, HT: Hypertension, DM: Diabetes mellitus 1 and 2, Resp: Respiratory disease, HD: Heart disease, Neu: Neurologic disease, RA: Rheumatoid arthritis, Dep: Depression, Ren/Liv: Renal and/or liver disease. \*Adjusted for age, sex, BMI, educational level, not born in Denmark, civil status, physical activity, problems in other joints, use of analgesics, and number of bodily pain areas.
